## **Wnt3 distribution in the zebrafish brain is determined by expression, diffusion and multiple molecular interactions**

Sapthaswaran Veerapathiran<sup>1,2</sup>, Cathleen Teh<sup>1,2</sup>, Shiwen Zhu<sup>1,2</sup>, Indira Kartigayen<sup>1,2</sup>, Vladimir Korzh<sup>3</sup>,  
Paul T. Matsudaira<sup>1,2</sup>, Thorsten Wohland<sup>1,2,4\*</sup>

<sup>1</sup> Department of Biological Sciences, National University of Singapore, 14 Science Drive 4, 117557 Singapore

<sup>2</sup> Center for BioImaging Sciences, National University of Singapore, 16 Science Drive 4, 117558 Singapore

<sup>3</sup> International Institute of Molecular and Cell Biology in Warsaw, Warsaw, Poland

<sup>4</sup> Department of Chemistry, National University of Singapore, 3 Science Drive 3, 117543, Singapore

### **\*Author for correspondence**

Thorsten Wohland

[twohland@nus.edu.sg](mailto:twohland@nus.edu.sg)

1 **Abstract**

2 Wnt3 proteins are lipidated and glycosylated, secreted signaling molecules that play an important  
3 role in zebrafish neural patterning and brain development. However, the transport mechanism of  
4 lipid-modified Wnts through the hydrophilic extracellular environment for long-range action re-  
5 mains unresolved. Here, we determine how Wnt3 accomplishes long-range distribution in the  
6 zebrafish brain. First, we characterize the Wnt3-producing source and Wnt3-receiving target re-  
7 gions. Subsequently, we analyze Wnt3 mobility at different length scales by fluorescence correla-  
8 tion spectroscopy and fluorescence recovery after photo-bleaching. We demonstrate that Wnt3  
9 spreads extracellularly and interacts with heparan sulfate proteoglycans (HSPG). We then deter-  
10 mine the binding affinity of Wnt3 to its receptor, Frizzled1 (Fzd1), using fluorescence cross-cor-  
11 relation spectroscopy, and show that the co-receptor, low-density lipoprotein receptor-related pro-  
12 tein 5 (Lrp5), is required for Wnt3-Fzd1 interaction. Our results are consistent with the extracel-  
13 lular distribution of Wnt3 by a diffusive mechanism that is modified by tissue morphology, inter-  
14 actions with HSPG and Lrp5-mediated receptor binding, to regulate zebrafish brain development.

15  
16

17 **Key Words:** Wnt3, Frizzled1, Lrp5, extracellular diffusion, heparan sulfate proteoglycans, Fluo-  
18 rescence correlation spectroscopy (FCS), Fluorescence cross-correlation spectroscopy (FCCS),  
19 Fluorescence recovery after photo-bleaching (FRAP).

20

21

22

23

24

25

## 26 **Introduction**

27 Wnt proteins represent a family of secreted signaling glycoproteins having multiple functions in  
28 embryonic development such as specification of the vertebrate axis, embryonic induction, mainte-  
29 nance of cell potency, cell fate determination, cell migration, cell division, and apoptosis, to name  
30 a few (Clevers & Nusse, 2012; Hikasa & Sokol, 2013; Logan & Nusse, 2004; Moon et al., 2002).  
31 So far, 13 *wnt* gene subfamilies have been identified, although the number of *wnt* genes differs  
32 between species (Schubert & Holland, 2013). Wnts are generally 350 – 400 amino acids in length  
33 (molecular weight of ~ 40 kDa), with highly conserved cysteine residues. Wnts are hydrophobic  
34 and water-insoluble due to their post-translational lipidation in the endoplasmic reticulum (ER)  
35 (Mikels & Nusse, 2006). Porcupine (Porc), an O-acyltransferase localized on the membrane of the  
36 ER, catalyzes the acylation of Wnts and provides Wnts hydrophobic characteristics (Herr & Basler,  
37 2012). The acylation facilitates the interaction of Wnts with Wntless, a transmembrane protein that  
38 shuttles Wnts to the plasma membrane (Galli et al., 2007). From the plasma membrane, they are  
39 secreted and transported to Wnt-receiving cells. Hence, the acylation of Wnts is a critical step for  
40 their trafficking, secretion and activity (Coudreuse & Korswagen, 2007).

41 The addition of lipid moieties makes the long-range free diffusion of Wnts in the aqueous extra-  
42 cellular matrix problematic. Several transport mechanisms were proposed to explain how Wnts  
43 navigate the aqueous environment to achieve long-range action (Routledge & Scholpp, 2019). Fa-  
44 cilitated shuttling of Wnts by chaperone proteins is a commonly reported mode of distribution.  
45 Here, Wnt-binding proteins such as secreted Frizzled-related proteins (sFRPs) (Esteve et al., 2011;  
46 Mii & Taira, 2009), Secreted Wg-interacting Molecule (Swim) (Mulligan et al., 2012) or afamin  
47 (Mihara et al., 2016) shield the hydrophobic regions of Wnts and provide stability in the aqueous  
48 environment. Similarly, hydrophobic Wnt molecules could be packaged inside exosomes and lip-  
49 oprotein particles, which enables their extracellular movement (Greco et al., 2001; Neumann et  
50 al., 2009; Panáková et al., 2005). Additionally, heparan sulfate proteoglycans (HSPG) present in  
51 the extracellular matrix serve as binding sites for several signaling molecules, including Wnts  
52 (Kirkpatrick & Selleck, 2007). HSPG maintains the solubility of Wnt ligands, and prevents their  
53 aggregation in the aqueous extracellular matrix, thereby enhancing their range and function (Fuerer  
54 et al., 2010; Mii et al., 2017). Further evidence suggests that HSPG in coordination with Wnts are  
55 pivotal in regulating gastrulation, neurulation and axis formation during embryonic development

56 (Ohkawara et al., 2003; Saied-Santiago et al., 2017; Tao et al., 2005; Topczewski et al., 2001). On  
57 the other hand, it was also recently noticed that certain Wnts could be deacylated by Notum, a  
58 secreted deacylase, but retain their signaling activity (Speer et al., 2019). Besides the extracellular  
59 transport mechanism, certain Wnt proteins may also reach their target tissues through filopodial  
60 extensions called cytonemes, as seen for Wnt2b in *Xenopus* (Holzer et al., 2012), Wg in *Drosoph-*  
61 *ila* (Huang & Kornberg, 2015) and Wnt8a in zebrafish embryos (Mattes et al., 2018; Stanganello  
62 et al., 2015).

63 Finally, when Wnts reach their target tissues, they bind to their target receptors and elicit a signal-  
64 ing cascade. To date, Wnts are known to interact with more than 15 receptor and co-receptor pro-  
65 tein families (Niehrs, 2012), of which the Frizzled (Fzd) receptor super-family is the most com-  
66 monly investigated. Fzd proteins are categorized under the Class-F super-family of G-protein cou-  
67 pled receptors. The super-family comprises 10 Fzd receptors (Fzd1-Fzd10) and Smoothened  
68 (SMO) (Schulte & Wright, 2018), all with a seven-pass transmembrane domain and a highly con-  
69 served cysteine-rich domain (CRD) (Hsieh et al., 1999; Wu & Nusse, 2002). Structural studies  
70 revealed that the low-density lipoprotein receptor-related protein (Lrp-5/6) acts as a co-receptor  
71 and is involved with the Wnt-Fzd complex (Chu et al., 2013; Hirai et al., 2019; Janda et al., 2012).  
72 The Wnt-Fzd-Lrp complex inhibits the negative regulator destruction complex and stabilizes the  
73 Wnt signaling transducer  $\beta$ -catenin, which allows the transcription of genes regulating embryonic  
74 development and patterning (Bilić et al., 2007).

75 Wnt3 proteins, a subset of the Wnt family, are instrumental in the development of the nervous  
76 system, vascular system, limb formation and vertebrate axis formation (Anne et al., 2013; Bulfone  
77 et al., 1993; Clements et al., 2009; Garriock et al., 2007; Liu et al., 1999). In zebrafish, Wnt3  
78 directs neural stem cell proliferation and differentiation, making it indispensable for brain devel-  
79 opment (Clements et al., 2009). Our group showed that in zebrafish embryos, Wnt3 associates  
80 with domains on the membrane (Azbazdar et al., 2019; Ng et al., 2016; Sezgin et al., 2017). Block-  
81 ing the activity of Porc and thus reducing Wnt acylation by the drug C59, resulted in reduced  
82 domain confinement and defective brain development in zebrafish embryos (Ng et al., 2016; Teh  
83 et al., 2015). The understanding of the Wnt3 action mechanism in zebrafish brain development,  
84 therefore, requires identifying its source regions, determining its mode of transport, demarcating  
85 receiving target tissues and measuring Wnt3-receptor interactions.

86 In this study, we first mapped the source and target regions of Wnt3 in the zebrafish brain by  
87 comparing the expression of a transgenic line expressing functional Wnt3EGFP, with a reporter  
88 line expressing an inner plasma membrane targeting sequence tagged with mApple (PMTmApple).  
89 The expression in both lines are regulated by a 4 kb *wnt3* promoter that contains most of the reg-  
90 ulatory elements and reports the spatiotemporal expression of *wnt3* (Teh et al., 2015). Wnt3EGFP  
91 spreads from where it is produced, while PMTmApple remains attached to the inner membrane  
92 leaflet of the producing cells. Hence, by analyzing the expression patterns of Wnt3EGFP and  
93 PMTmApple, we were able to identify the midbrain-hindbrain boundary (MHB), the brain midline  
94 (roof plate and floor plate) and the epithalamus as source regions of Wnt3, and the optic tectum  
95 (OT) and ventral regions of the cerebellum as distal target regions. Subsequently, we probed how  
96 Wnt3 is distributed from the source to the target regions of the zebrafish brain by measuring its *in*  
97 *vivo* dynamics using fluorescence correlation spectroscopy (FCS) and fluorescence recovery after  
98 photo-bleaching (FRAP). FCS is a single molecule sensitive technique that statistically analyzes  
99 the intensity fluctuations in a small observation volume (~ femtoliter scale) to generate an auto-  
100 correlation function, from which the diffusion coefficient and the concentration of the fluorescent  
101 molecules in the observation volume are accurately evaluated (Enderlein et al., 2005; Kim et al.,  
102 2007; Krichevsky & Bonnet, 2002; Magde et al., 1974). FRAP, on the contrary, is an ensemble  
103 technique that measures the dynamics of the fluorescent molecules in a large region of interest (~  
104 micrometer scale) based on the recovery of the fluorescence intensity in an irreversibly photo-  
105 bleached region (Klonis et al., 2002; Koppel et al., 1976). FCS and FRAP both measure molecular  
106 mobilities and have been shown to provide consistent results (Macháň et al., 2016). However, as  
107 they access very different length scales, they can provide complementary information on local and  
108 global diffusion (Müller et al., 2012, 2013; Veerapathiran & Wohland, 2018).

109 Lastly, we monitored the *in vivo* interaction of Wnt3 with Fzd1, a potential target receptor, using  
110 fluorescence cross-correlation spectroscopy (FCCS) and calculated their binding affinity. In  
111 FCCS, the intensity fluctuations of two interacting molecules tagged with spectrally different  
112 fluorophores in an observation volume are cross-correlated, and their binding affinity *in vivo* is  
113 measured (Ries et al., 2009; Schwille et al., 1997; Shi et al., 2009). We observed that the co-  
114 receptor Lrp5 is essential for the interaction of Wnt3 with Fzd1. Our findings show that Wnt3  
115 spreads from its source to target regions by extracellular diffusion governed by interactions with  
116 HSPG and its receptors.

117

## 118 **Results**

### 119 **Identifying the Source and Target Regions for Wnt3**

120 In order to identify the source and target regions of Wnt3, we used two transgenic lines: Tg(-  
121 4.0*wnt3*:Wnt3EGFP) and Tg(-4.0*wnt3*:PMTmApple). Tg(-4.0*wnt3*:Wnt3EGFP) is a functionally  
122 active Wnt3EGFP-expressing line, where Wnt3EGFP expression driven by 4 kb *wnt3* promoter  
123 (Teh et al., 2015). Tg(-4.0*wnt3*:PMTmApple) is a reporter line driven by the same 4 kb *wnt3* pro-  
124 moter, expressing PMTmApple. Since the 4 kb *wnt3* promoter contains most of the regulatory  
125 elements, Tg(-4.0*wnt3*:PMTmApple) is a faithful reporter of Wnt3 expression, which marks the  
126 plasma membrane of the Wnt3-producing cells. However, the localization of PMTmApple is re-  
127 stricted to its source cells, as it remains tethered to the inner leaflet of the plasma membrane. In  
128 contrast, the distribution pattern of Wnt3EGFP in Tg(-4.0*wnt3*:Wnt3EGFP) spans a broader range  
129 compared to PMTmApple in Tg(-4.0*wnt3*:PMTmApple), implying that Wnt3EGFP is transported  
130 from the source regions where it is produced to its distal target regions (**Figure 1**). The overlap in  
131 the expression of the two lines, therefore, identifies the source regions, and the difference demar-  
132 cates the distal target regions.

133 The two transgenic lines were crossed [Tg(-4.0*wnt3*:Wnt3EGFP) × Tg(-4.0*wnt3*:PMTmApple)]  
134 and the expression of Wnt3EGFP and PMTmApple were sequentially recorded using a confocal  
135 microscope in their respective wavelength channels. Firstly, the obtained image stacks were seg-  
136 mented using an automatic threshold algorithm (Zhu et al., 2016), and the colocalization of each  
137 pixel was evaluated based on the intensity correlation analysis (ICA), the distance weight and  
138 intensity weight (Li et al., 2004; Zhu et al., 2016) to generate a pair of masks for the colocalized  
139 and non-colocalized pixels. Subsequently, color-coded heat maps were generated, indicating the  
140 contribution of each pixel to the overall colocalization at 24 and 48 hpf (**Video 1A and 1B**). Fi-  
141 nally, using the colocalized and non-colocalized masks, volumetric images were constructed to  
142 distinguish the source and target regions of Wnt3 respectively. At 24 hpf, the source regions were  
143 midbrain-hindbrain boundary (MHB), dorsal cerebellum (dCe), and epithalamus (Epi); whereas  
144 the distal target regions were ventral cerebellum (vCB) and optic tectum (OT) (**Figure 2 and**

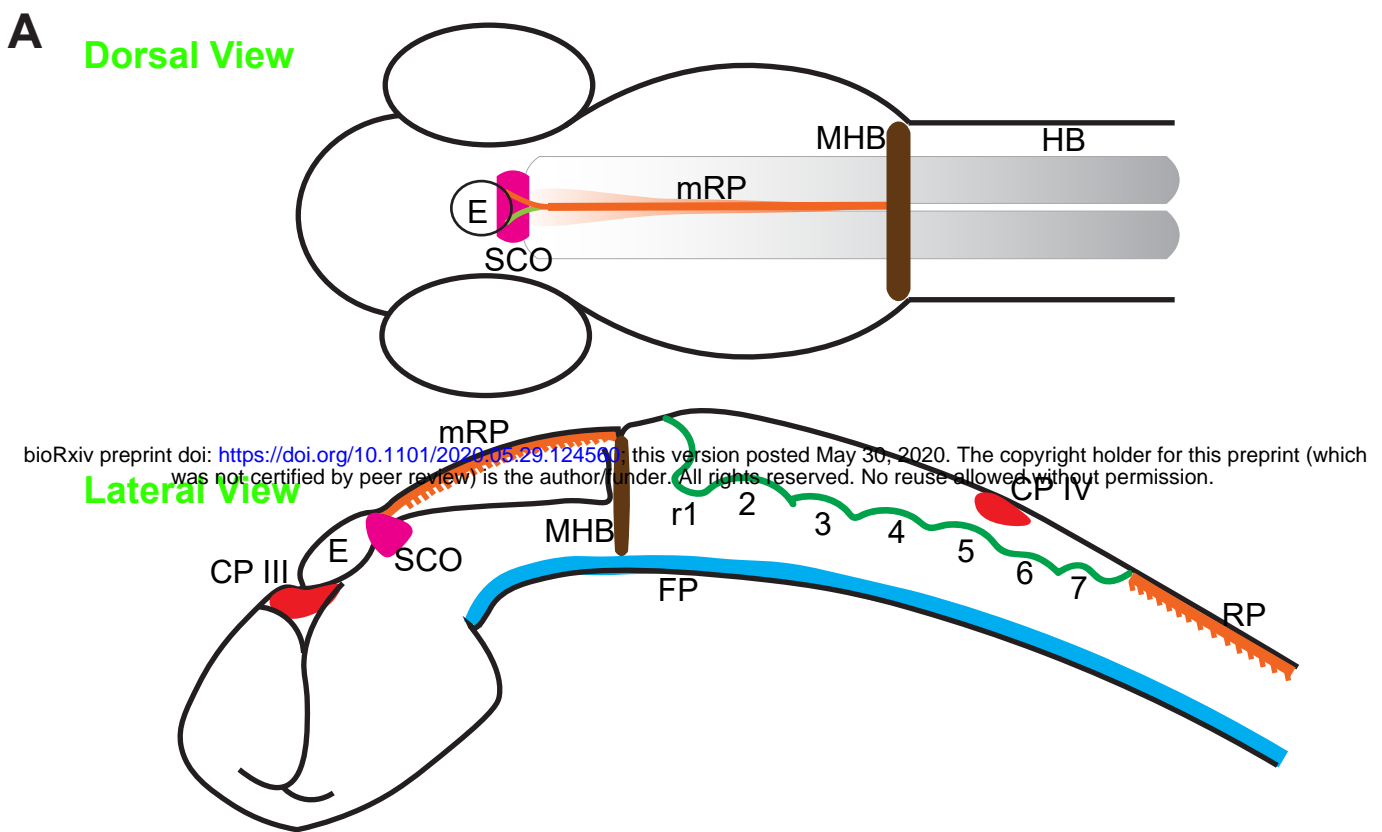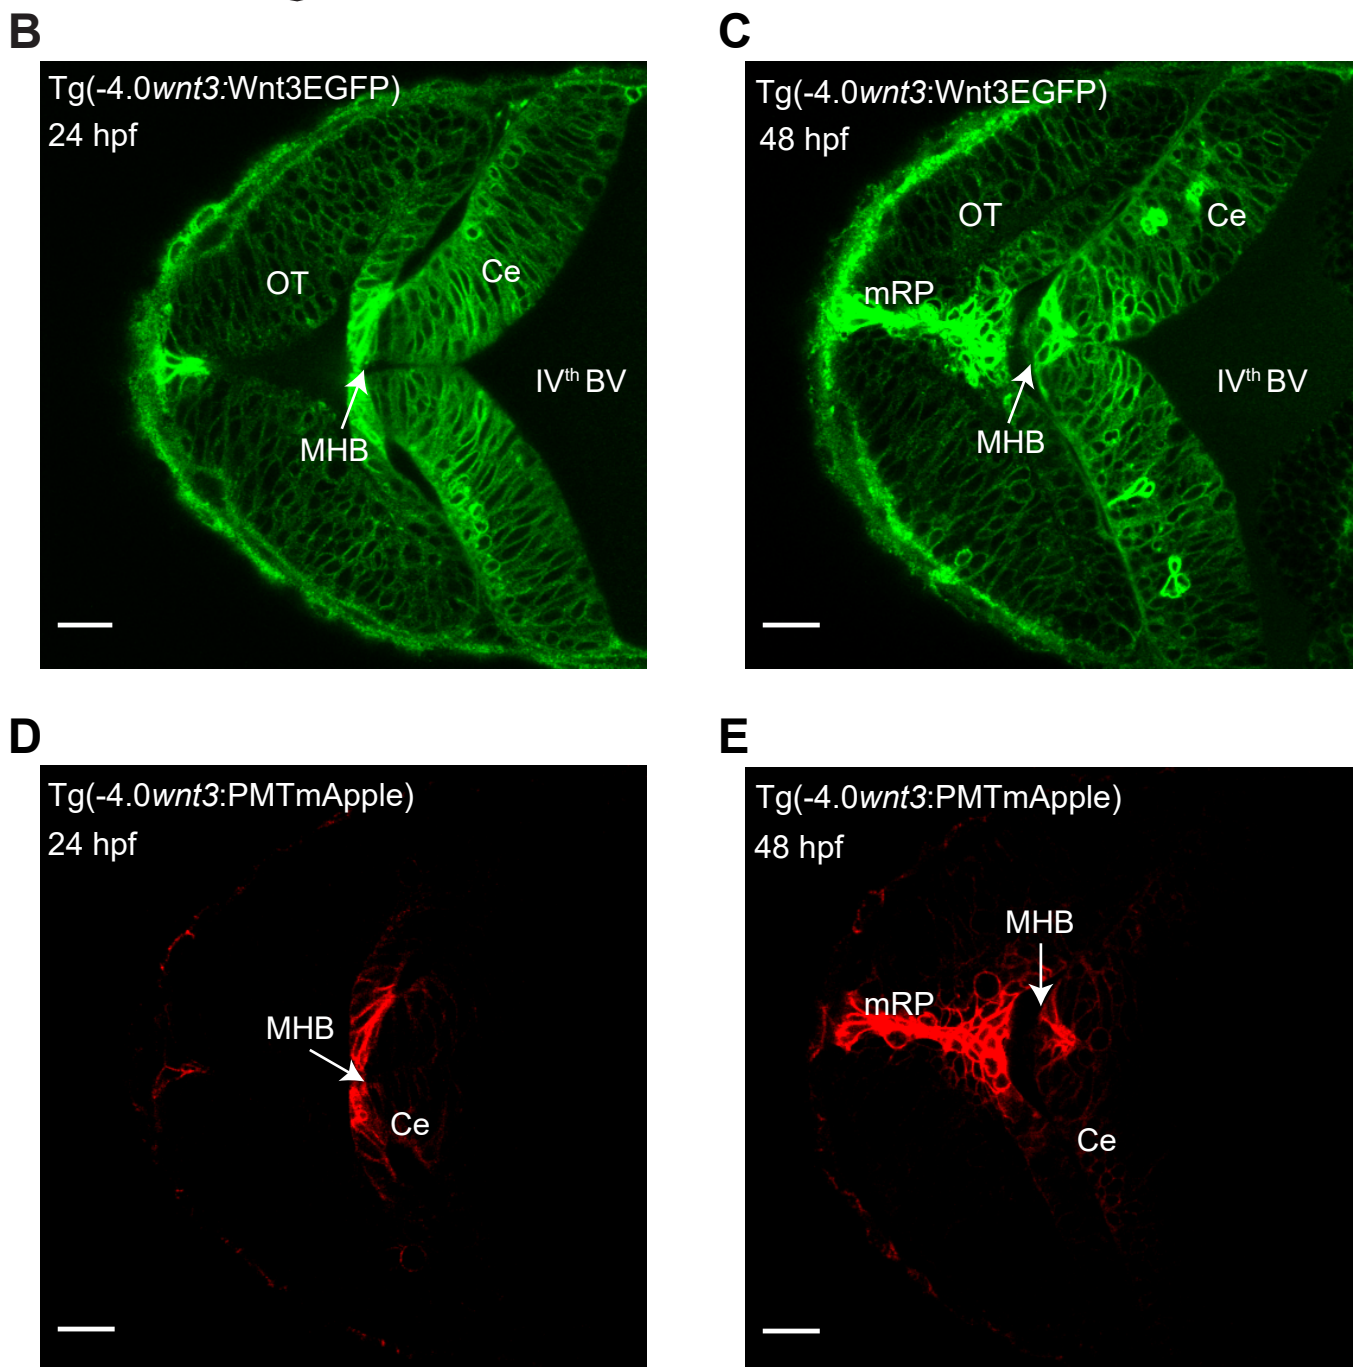

**Figure 1: Spatiotemporal expression of *wnt3* promoter driven Wnt3EGFP and PMTmApple.**

(A) Schematic illustration of the brain of a zebrafish embryo (Dorsal view and Lateral view). Expression profile of Wnt3EGFP in Tg(-4.0*wnt3*:Wnt3EGFP) line at (B) 24 hpf and (C) 48hpf. Expression profile of PMTmApple in Tg(-4.0*wnt3*:PMTmApple) line at (D) 24 hpf and (E) 48hpf. BV, brain ventricle; Ce, cerebellum; CP, choroid plexus; E, epiphysis; FP, floor plate; HB, hindbrain; MHB, mid-brain-hindbrain boundary; mRP, midbrain roof plate; OT, optic tectum; r, rhombomere RP, roof plate (spinal cord); SCO, sub-commissural organ. Scale bar 30  $\mu$ m.

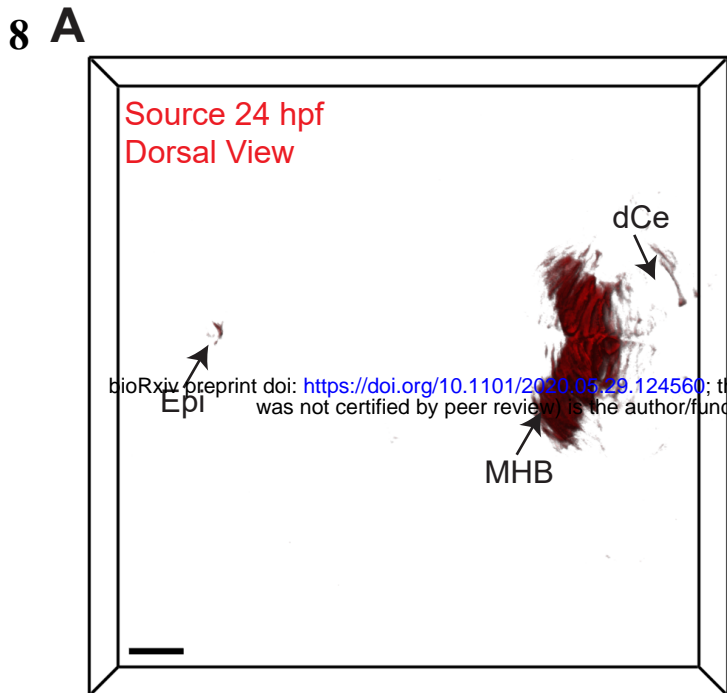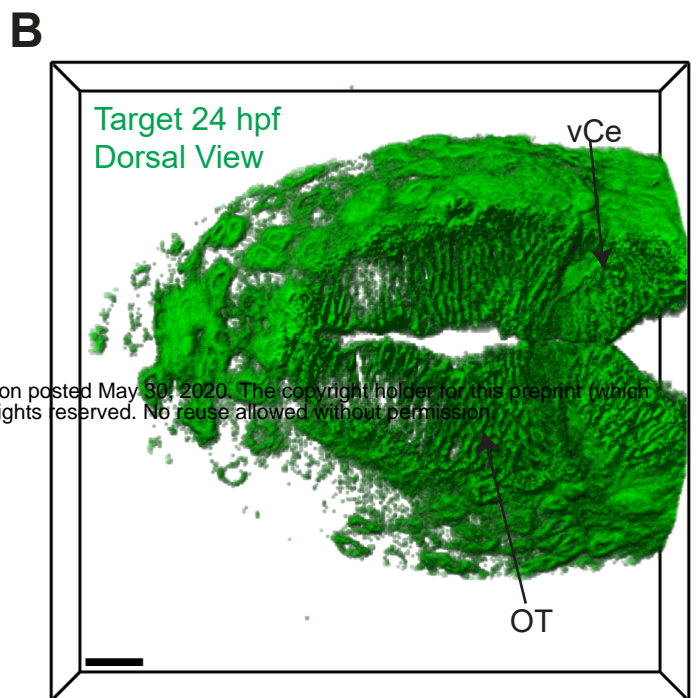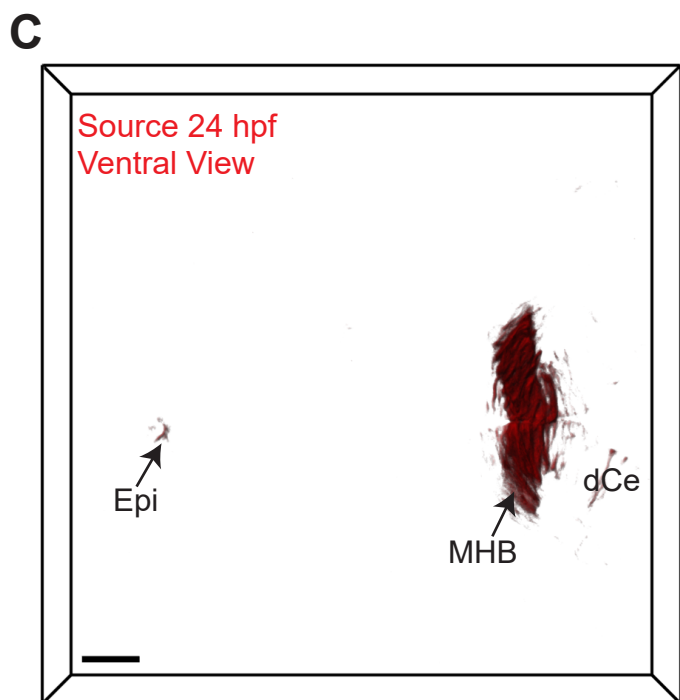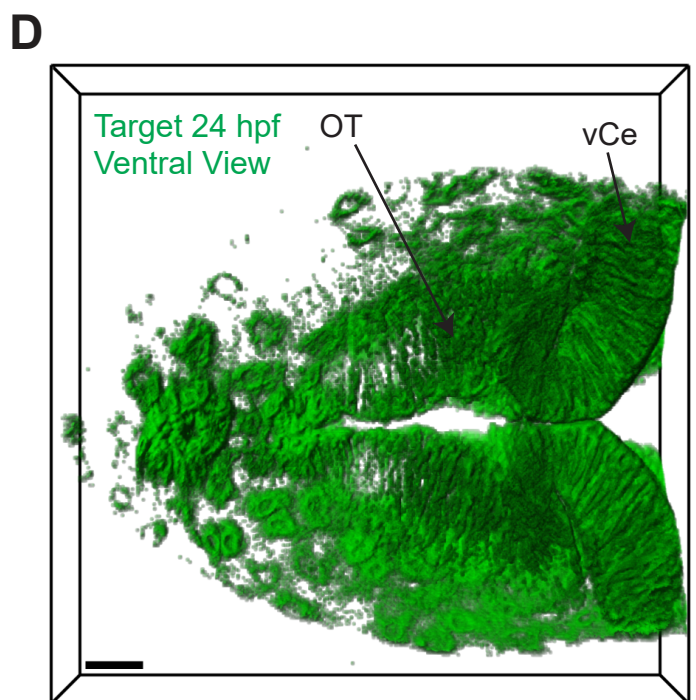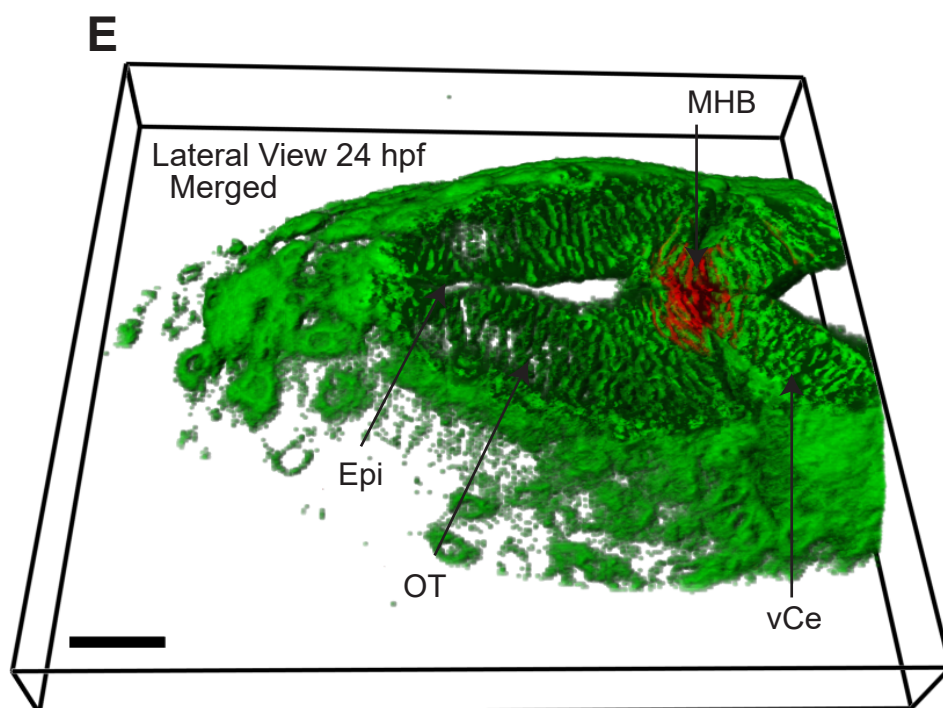

**Figure 2: Identifying Wnt3 source and target regions at 24 hpf.**

3D dorsal projection of Wnt3 (A) source regions at 24 hpf and (B) target regions at 24 hpf (Top view). 3D ventral projection of Wnt3 (C) source regions from at 24 hpf and (D) target regions at 24 hpf (Bottom view).

(E) 3D projection of Wnt3 source and target regions from at 24 hpf (Lateral view). See Video 2 for a detailed view. dCe, dorsal regions of cerebellum; Epi, epithalamus; MHB, midbrain-hindbrain boundary; OT, optic tectum; vCe, ventral regions of cerebellum. Scale bar 30  $\mu$ m.



145 **Video 2).** The source regions at 48 hpf were the midbrain roof plate (mRP), floor plate (FP), mid-  
146 brain-hindbrain boundary (MHB), dorsal cerebellum (dCe), epithalamus (Epi), and some parts of  
147 the dorso-lateral optic tectum (dOT); while the distal target regions were ventral cerebellum (vCe),  
148 and ventral optic tectum (vOT) (**Figure 3 and Video 3**). The mapped source regions agreed with  
149 the *in vivo* expression pattern of the *wnt3* gene as shown at mRNA level by whole mount *in situ*  
150 hybridization (**Supplementary Figure 1**). With the source and target regions defined, we next  
151 quantified the dynamics of Wnt3, and examined the mode of dispersal of Wnt3 from the source to  
152 the distal target regions.

### 153 **Characterizing the *in vivo* dynamics of Wnt3EGFP**

154 At 24 and 48 hpf the cells are densely packed in the cerebellum, and optic tectum and there is no  
155 apparent extracellular space resolved within the limits of our microscopes ( $\sim 200$  nm). It is thus not  
156 possible to determine from imaging alone whether Wnt3 is present in the interstitial spaces. We  
157 therefore use an indirect approach and measure the molecular mobility of Wnt3 at the borders  
158 between neighboring cells (**Figure 4 A, B**). As diffusion coefficients on membranes and in aque-  
159 ous solution differ by at least one order of magnitude if not more, they can be easily distinguished,  
160 and the presence of a freely diffusible species can be identified. For FCS measurements along the  
161 cell borders, we used a 2D-2particle-1triplet model (See Materials and Methods equation 7) as the  
162 fit model, as determined by the Bayes inference-based model selection (Sun et al., 2015; Teh et  
163 al., 2015). The fact that data can be fit with a 2D model most likely indicates that Wnt3 either  
164 diffuses on the membrane or in the narrow interstitial spaces that have a very small extent ( $< 200$   
165 nm) compared to the axial extent of the confocal volume ( $\sim 1$   $\mu\text{m}$ ). We detected two diffusive  
166 components from these measurements: a slow component with a diffusion coefficient ( $D_{\text{slow}}$ ) of  
167  $0.6 \pm 0.3$   $\mu\text{m}^2/\text{s}$  and a fast component with a diffusion coefficient ( $D_{\text{fast}}$ ) of  $27.6 \pm 3.9$   $\mu\text{m}^2/\text{s}$  (**Figure**  
168 **4E**). The slow diffusive component was the dominant fraction ( $F_{\text{slow}} \sim 0.6 \pm 0.05$ ) and represents  
169 the fraction of Wnt3 on the membrane. Note, however, that we cannot unambiguously assign the  
170 fast diffusion coefficient to Wnt3 in the interstitial spaces. The confocal volume for FCS measure-  
171 ments on the membrane also spans a portion of the intracellular cytosol. Hence, a fraction of Wnt3  
172 within the cytosol could have contributed to the fast diffusion. Therefore, we tested whether the  
173 fast diffusion coefficient is susceptible to changes in the interstitial spaces, as discussed in the  
174 following section.

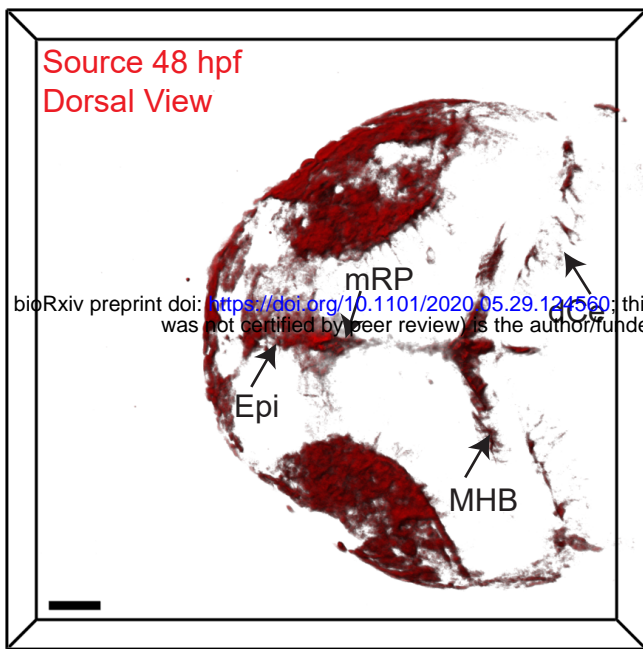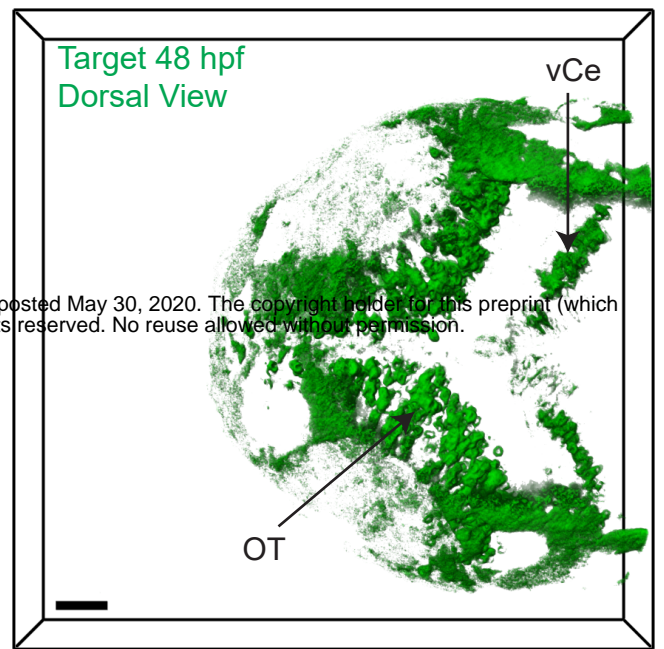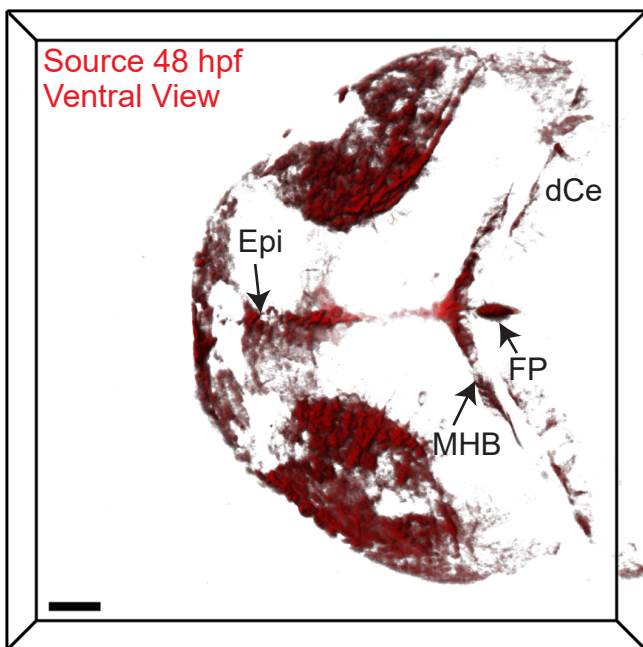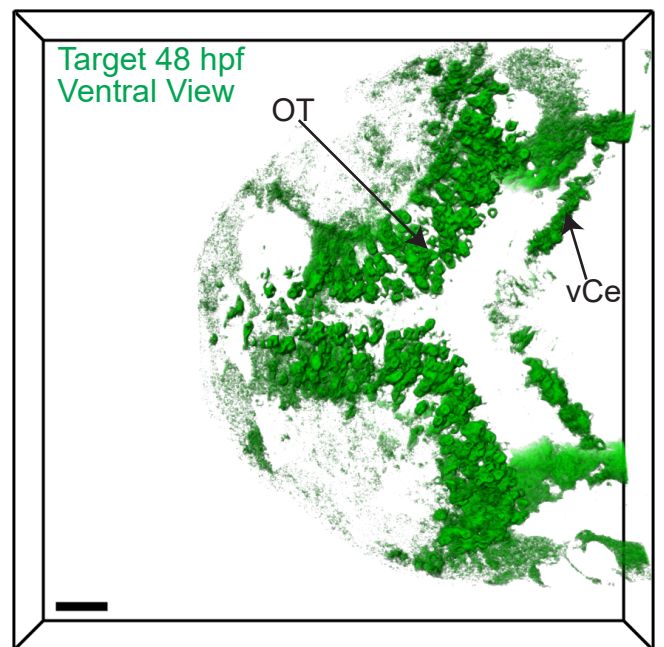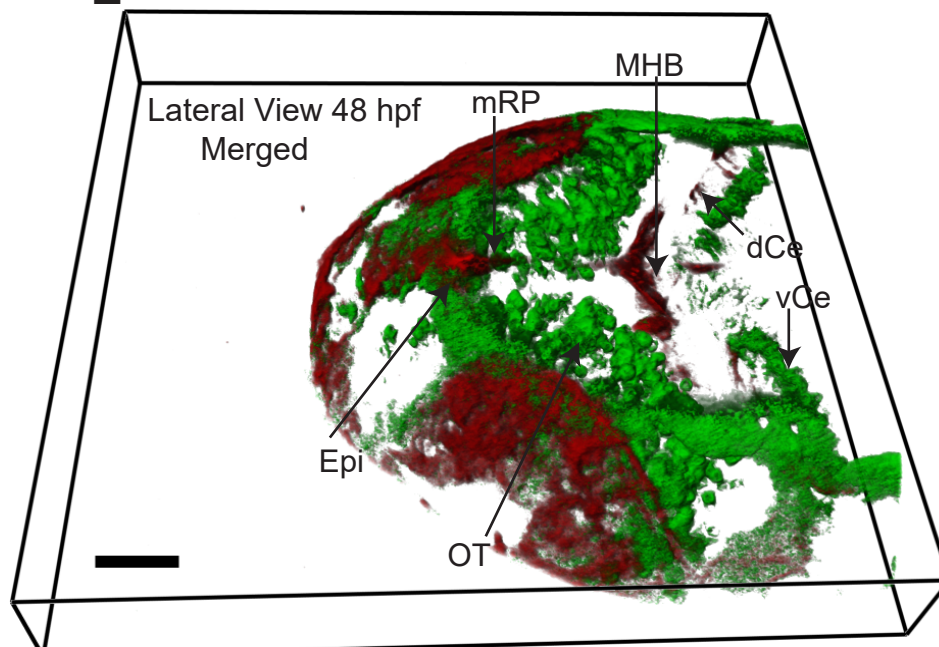

**Figure 3: Identifying Wnt3 source and target regions at 48 hpf.**

3D dorsal projection of Wnt3 (A) source regions at 48 hpf and (B) target regions at 48 hpf (Top view). 3D ventral projection of Wnt3 (C) source regions from at 48 hpf and (D) target regions at 48 hpf (Bottom view). (E) 3D projection of Wnt3 source and target regions from at 48 hpf (Lateral view). See Video 3 for detailed view.

dCe, dorsal regions of cerebellum; Epi, epithalamus; FP, floor plate; MHB, midbrain-hindbrain boundary; mRP, midbrain roof plate; OT, optic tectum; vCe, ventral regions of cerebellum. Scale bar 40  $\mu$ m.

11A

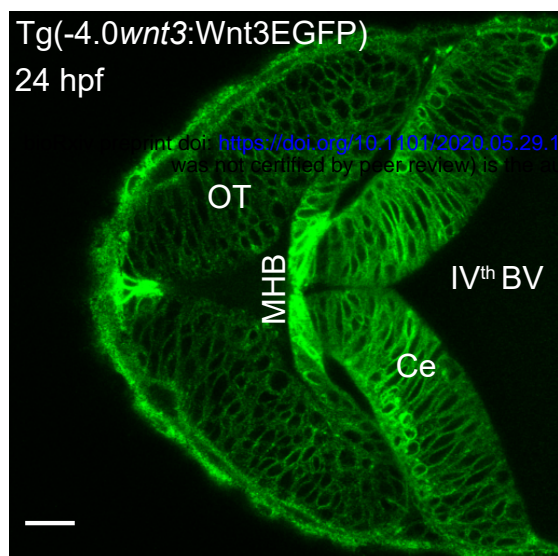

B

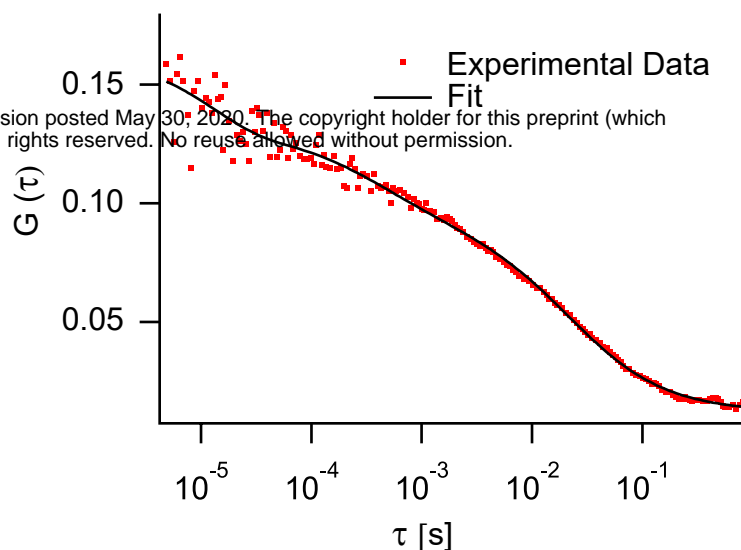

C

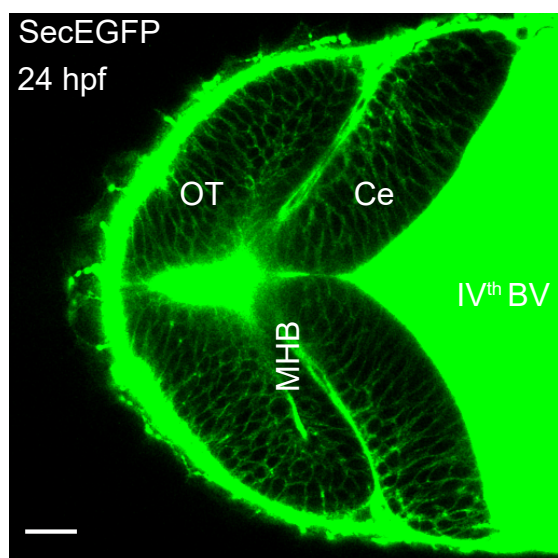

D

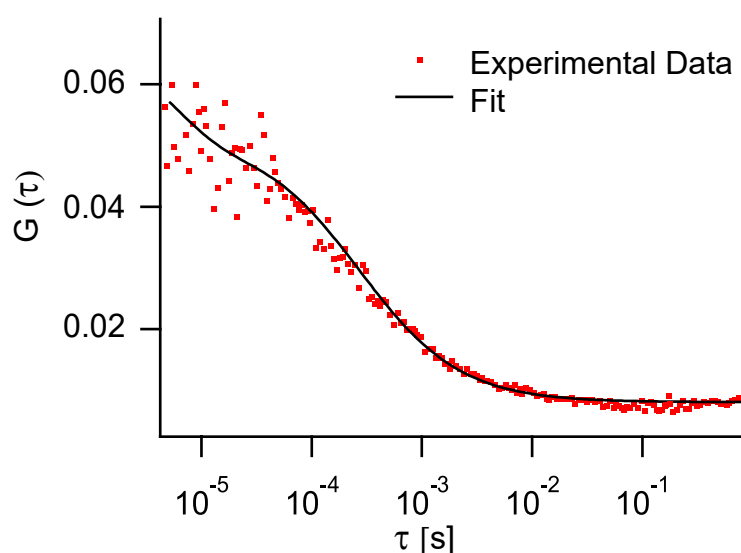

E

| Sample                        | $D_{\text{fast}}$<br>[ $\mu\text{m}^2/\text{s}$ ] | $D_{\text{slow}}$<br>[ $\mu\text{m}^2/\text{s}$ ] | $F_{\text{slow}}$ | N  |
|-------------------------------|---------------------------------------------------|---------------------------------------------------|-------------------|----|
| Wnt3EGFP<br>(Cell boundaries) | $27.6 \pm 3.9$                                    | $0.6 \pm 0.3$                                     | $0.6 \pm 0.04$    | 24 |
| Wnt3EGFP<br>(Brain Ventricle) | $54.6 \pm 11.3$                                   | $4.8 \pm 3.4$                                     | $0.1 \pm 0.1$     | 24 |
| secEGFP<br>(Cell boundaries)  | $57.9 \pm 14.4$                                   | —                                                 | —                 | 15 |
| secEGFP<br>(Brain Ventricle)  | $87.5 \pm 11.3$                                   | —                                                 | —                 | 18 |

**Figure 4: Determination of diffusion coefficients of Wnt3EGFP and secreted EGFP by FCS.**

(A) Expression of Wnt3EGFP in transgenic Tg(-4.0wnt3:Wnt3EGFP) line. (B) Representative autocorrelation function (dots) and fitting (line) of Wnt3EGFP measurement at cell boundary. (C) Expression of secEGFP in zebrafish brain. (D) Representative autocorrelation function (dots) and fitting (line) of secEGFP measurement at a cell boundary. (E) Table showing diffusion coefficients of the fast component ( $D_{\text{fast}}$ ), slow component ( $D_{\text{slow}}$ ) and the fraction of slow component ( $F_{\text{slow}}$ ) for Wnt3EGFP and secEGFP. Data are Mean  $\pm$  SD; N = No of measurements. BV, brain ventricle; Ce, cerebellum; MHB, midbrain-hindbrain boundary; OT, optic tectum. Scale bar 30  $\mu\text{m}$ .

175

176 **Wnt3 spreads extracellularly in the interstitial spaces**

177 As Wnts are highly hydrophobic molecules, they tend to aggregate after being secreted into the  
178 extracellular milieu, which would limit them to autocrine and juxtacrine signaling (Fuerer et al.,  
179 2010). However, the expression of Wnt3EGFP in Tg(-4.0*wnt3*:Wnt3EGFP) was detected at a dis-  
180 tance ( $\sim 50 - 150 \mu\text{m}$ ) from the recognized source regions, implying long-range travel. Hence, we  
181 examined how Wnt3 spreads across the zebrafish brain, and whether it chooses the extracellular  
182 route. Since the cells are tightly packed at late stages (after 24 hpf) of the zebrafish embryo, we  
183 first verified the existence of the interstitial spaces at these late stages. We injected secreted EGFP  
184 (secEGFP), the secretory peptide of Fibroblast growth factor 8a (Fgf8a) tagged with EGFP, at the  
185 one-cell stage and imaged the zebrafish brain at 48 hpf. The secEGFP is targeted for extracellular  
186 secretion after their translation in the cytoplasm and a marker of the interstitial spaces. We ob-  
187 served the expression of secEGFP along the cell boundaries of the zebrafish brain and in the brain  
188 ventricles (**Figure 4C**). When the dynamics for secEGFP was measured using FCS, we obtained  
189 a  $D$  of  $57.9 \pm 14.4 \mu\text{m}^2/\text{s}$  along the cell boundaries (**Figure 4 D, E**). As secEGFP does not bind to  
190 the cell membrane, this indicates its diffusion in the extracellular spaces, consistent with the fast  
191 diffusion coefficient measured (Müller et al., 2012, 2013).

192 As mentioned above, we were unable to unambiguously assign Wnt3 diffusion to its presence in  
193 interstitial spaces. Thus, we evaluated the effects of HSPG, a cell surface and extracellular matrix  
194 protein which should influence only molecules in interstitial spaces, on the dynamics of Wnt3.  
195 Since the interactions of Wnts with HSPG and the significance of HSPG in the activity of Wnts is  
196 well established (Fuerer et al., 2010; Kirkpatrick & Selleck, 2007; Mii et al., 2017), we treated the  
197 Tg(-4.0*wnt3*:Wnt3EGFP) embryos with heparinase to disrupt the HSPG and measured the dynam-  
198 ics of Wnt3EGFP. Injecting heparinase at the one-cell stage showed impaired gastrulation, so hep-  
199 arinase along with a high molecular weight fluorescent dextran (70,000 MW Dextran-TRITC) was  
200 co-injected in the brain ventricle of 48 hpf Wnt3EGFP expressing embryos. Since the presence of  
201 fluorescent dextran was detected along cell boundaries of the cerebellum and optic tectum, we  
202 inferred that heparinase ( $\sim 42 \text{kDa}$ ) also diffused into the interstitial spaces from the brain ventricle  
203 (**Supplementary Figure 2**). Confocal FCS measurements revealed that while the  $D_{\text{slow}}$  of Wnt3  
204 for heparinase treated and untreated embryos remained the same, the  $D_{\text{fast}}$  for heparinase treated

205 embryos was almost two-fold higher ( $D_{fast} = 43.4 \pm 7.6 \mu\text{m}^2/\text{s}$ ) in comparison to the untreated  
 206 embryos ( $D_{fast} = 24.7 \pm 4.8 \mu\text{m}^2/\text{s}$ ) (**Table 1**).

207 **Table 1: Influence of Heparan Sulfate Proteoglycans on the dynamics of Wnt3EGFP, LynEGFP and**  
 208 **secretedEGFP**

| <i>Sample</i>                | $D_{fast} [\mu\text{m}^2/\text{s}]$ | $D_{slow} [\mu\text{m}^2/\text{s}]$ | $F_{slow}$     | <i>No. of measurements</i> |
|------------------------------|-------------------------------------|-------------------------------------|----------------|----------------------------|
| <b>Wnt3EGFP</b>              | $24.7 \pm 4.8$                      | $0.6 \pm 0.3$                       | $0.6 \pm 0.02$ | 47                         |
| <b>Wnt3EGFP + Heparinase</b> | $43.4 \pm 7.6$                      | $0.4 \pm 0.2$                       | $0.6 \pm 0.04$ | 63                         |
| <b>LynEGFP</b>               | $39.1 \pm 11.2$                     | $2.2 \pm 0.6$                       | $0.7 \pm 0.04$ | 29                         |
| <b>LynEGFP + Heparinase</b>  | $40.1 \pm 9.5$                      | $2.7 \pm 0.7$                       | $0.6 \pm 0.04$ | 35                         |
| <b>SecEGFP</b>               | $59.4 \pm 9.4$                      | -                                   | -              | 30                         |
| <b>SecEGFP + Heparinase</b>  | $56.9 \pm 9.7$                      | -                                   | -              | 30                         |

209 Data are Mean  $\pm$  S.D. Unpaired two-tail t-test were performed between untreated and the corresponding  
 210 heparinase treated embryos. For  $D_{fast}$ , p-value was  $< 0.0001$  for Wnt3EGFP and the difference was non-  
 211 significant for LynEGFP and SecEGFP. The difference was non-significant for other parameters in all sam-  
 212 ples.

213 As controls, we measured the effects of heparinase treatment on the diffusion of secEGFP and  
 214 LynEGFP (a non-functional membrane tethered tyrosine kinase). When secEGFP embryos were  
 215 treated with heparinase, we observed no change in D compared to the untreated embryos (**Table**  
 216 **1**). For LynEGFP in Tg(-8.0*cldnB*:LynEGFP), we obtained a slow component with a  $D_{slow}$  of  $2.2$   
 217  $\pm 0.6 \mu\text{m}^2/\text{s}$  and a fast component with a  $D_{fast}$  of  $39.1 \pm 11.2 \mu\text{m}^2/\text{s}$ .  $D_{slow}$  corresponds to the mem-  
 218 brane diffusing component while  $D_{fast}$  represents a putative cytosolic fraction. When LynEGFP  
 219 embryos were treated with heparinase, we did not observe any changes in  $D_{fast}$  or  $D_{slow}$ , confirming  
 220 that neither membrane nor cytosolic diffusion are influenced by HSPG disruption (**Table 1**). This

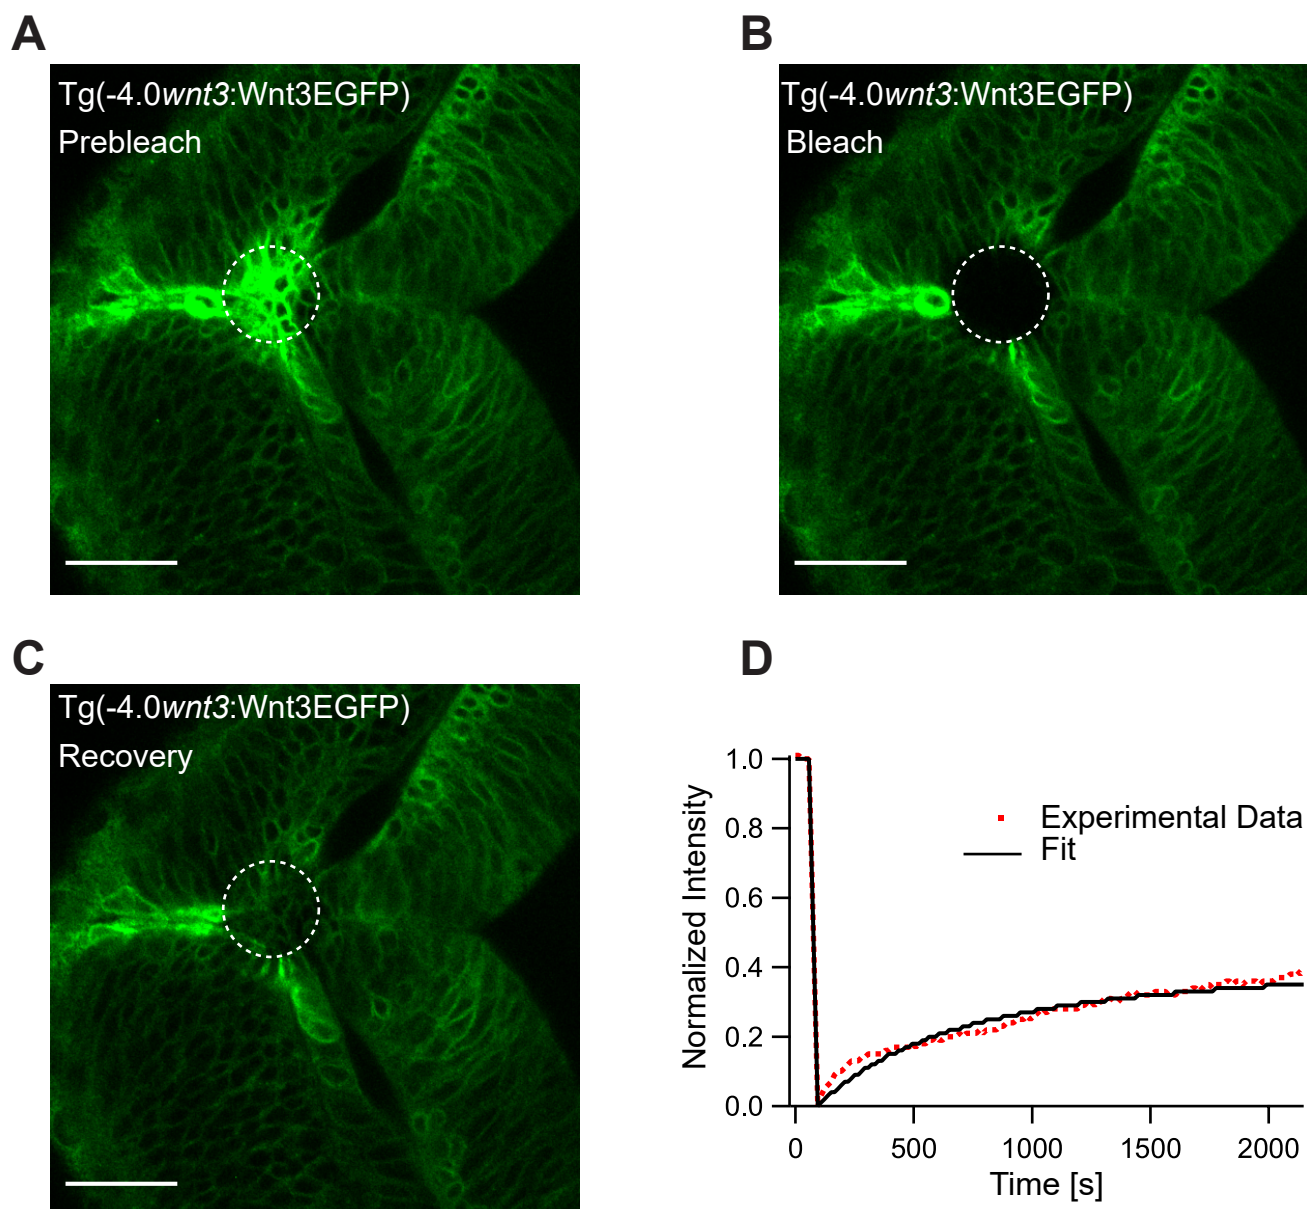

**Figure 5: Representative fluorescence recovery of Wnt3EGFP after photobleaching.**

(A) Expression of Wnt3EGFP in Tg(-4.0*wnt3*:Wnt3EGFP) before photobleaching. (B) Photobleached region of Wnt3EGFP. (C) Recovery of fluorescence intensity in the bleached region due to diffusion of molecules from the neighboring unbleached regions. (D) Fluorescence recovery curve for Wnt3EGFP with a recovery time ( $\tau_{\text{fast}}$ ) of  $\sim 5$  minutes and a mobile component fraction ( $F_m$ ) of  $\sim 0.35$ . The average global diffusion coefficient ( $D_{\text{eff}}$ ) measured for Wnt3EGFP was  $0.5 \pm 0.2 \mu\text{m}^2/\text{s}$  ( $N=11$ ). Scale bar  $30 \mu\text{m}$ .

221 supports the hypothesis that Wnt3 is diffusing in the extracellular space and is regulated by inter-  
222 actions with HSPG.

223 To substantiate our results, we determined the global diffusion of Wnt3 using FRAP. As FRAP  
224 measures mobility over a range of several cell diameters, it is an ideal tool to investigate whether  
225 Wnt3 can diffuse extracellularly or by other much slower cellular mechanisms. We irreversibly  
226 photobleached a region of the zebrafish brain in Tg(-4.0wnt3:Wnt3EGFP) embryos, and observed  
227 the rate of recovery in the photobleached region. On analyzing the FRAP curve for Wnt3EGFP,  
228 two components with different recovery rates were obtained: a fast component with a recovery  
229 rate ( $\tau_{\text{fast}}$ ) of 5-8 minutes and a slow component with a recovery rate  $\tau_{\text{slow}} > 40$  minutes. The mobile  
230 fraction ( $F_m$ ) of Wnt3EGFP evaluated from the FRAP curve was 0.3-0.4 with an effective diffusion  
231 coefficient ( $D_{\text{eff}}$ ) of  $0.5 \pm 0.2 \mu\text{m}^2/\text{s}$  (**Figure 5**). When FRAP was performed for secEGFP and  
232 PMTmApple expressing embryos in the same region of the zebrafish brain, secEGFP showed rapid  
233 recovery of 13 - 30 s (with  $F_m$  of 0.7 - 0.9 and  $D_{\text{eff}}$  of  $13 \pm 4 \mu\text{m}^2/\text{s}$ ) (**Supplementary Figure 3**),  
234 while PMTmApple showed no recovery within the same measurement time (**Supplementary Fig-**  
235 **ure 4**). Although the source regions continuously produce PMTmApple, the generation of novel  
236 PMTmApple involves transcription, translation, and post-translational chromophore maturation  
237 (maturation time for mApple is  $\sim 30$  minutes). Since PMTmApple is tethered to the cell membrane,  
238 no recovery is observed after photobleaching of PMTmApple before 30 minutes. Hence, the re-  
239 covery within 5-8 minutes for Wnt3EGFP points towards an extracellular distribution of  
240 Wnt3EGFP in the interstitial spaces of the developing zebrafish brain but with almost twenty-five-  
241 fold reduced D compared to secEGFP.

242

243 **The *in vivo* interactions of Wnt3 with Fzd1 receptor depends on the expression of *lrp5* co-**  
244 **receptor.**

245 Apart from the interactions of signaling molecules with the extracellular matrix proteins, the tran-  
246 sient trapping of ligands by their receptors also shapes their distribution profile (Müller et al.,  
247 2013). For instance, the transient binding of Nodals to their receptor Acvr2b and co-receptor Oep  
248 (Lord et al., 2019; Wang et al., 2016), Hedgehog to the 12-transmembrane protein Dispatched  
249 (Callejo et al., 2011) and Wingless to the Fzd receptor (Baeg et al., 2004) influence their respective  
250 distributions and gradient kinetics. Hence, it is critical to evaluate the binding affinity of Wnt3

251 with its target receptors to understand its signaling range and action. Although the binding affini-  
252 ties for different Wnt ligands and Fzd receptors were quantified, they were limited to biochemical  
253 analysis on mammalian cell lines (Dijksterhuis et al., 2015). The dynamics and conformation of  
254 proteins might differ significantly *in vivo* (Lipinski & Hopkins, 2004), and quantitative analysis of  
255 Wnt-Fzd interactions in live organisms is still lacking. Since *in vitro* genetic and biochemical as-  
256 says reported that Wnt3 interacts strongly with Fzd1 (Dijksterhuis et al., 2015), we investigated  
257 the *in vivo* Wnt3-Fzd1 interaction and measured its binding affinity. For this purpose, we generated  
258 a transgenic line Tg(-4.0wnt3:Fzd1mApple) expressing Fzd1mApple, crossed it with the  
259 Wnt3EGFP expressing line, and studied *in vivo* interactions using quasi-PIE FCCS (**Figure 6**  
260 **A,B**). Quasi-PIE FCCS is an extension of FCCS, where the sample is simultaneously illuminated  
261 by a pulsed laser line and a continuous wave laser line of different wavelengths (Padilla-Parra et  
262 al., 2011; Yavas et al., 2016). This approach allows us to filter the background, spectral cross-talk,  
263 and detector after pulsing while computing the auto- and cross-correlation functions (Kapusta et  
264 al., 2012). When quasi-PIE FCCS measurements were performed in embryos expressing  
265 Wnt3EGFP and Fzd1mApple, we obtained cross-correlation between the two channels, indicating  
266 the *in vivo* interaction of Wnt3 with Fzd1 (**Figure 6C**). As a positive control, we used embryos  
267 expressing PMT-mApple-mEGFP, and as negative control, we used embryos expressing  
268 Wnt3EGFP and PMTmApple by crossing their respective transgenic lines (**Supplementary Fig-**  
269 **ure 5**). The auto- and cross-correlations were then fitted with equation (7), and the binding affinity  
270 was measured according to equation (12) (**See Materials & Methods**). We obtained an apparent  
271 dissociation constant ( $K_d$ ) of  $112 \pm 15$  nM indicating that Wnt3 binds strongly with Fzd1 *in vivo*  
272 (**Figure 6D**). The measured *in vivo*  $K_d$  for Wnt3-Fzd1 is comparable with the *in vitro*  $K_d$  values  
273 reported for Wnts with Fzd1, which were in the range of 15 – 90 nM (Dijksterhuis et al., 2015).

274 Interestingly, Wnt3-Fzd1 interactions were only detected in the MHB and the dorsal cerebellum  
275 of the zebrafish brain at 48 hpf. No interactions were detected in the ventral cerebellum or optic  
276 tectum despite detecting Wnt3 and Fzd1 in these regions. Since the expression of the co-receptor  
277 *lrp5* corresponds to the specific regions where we detected interactions (Willems et al., 2015), we  
278 hypothesized that Lrp5 is necessary for the *in vivo* binding of Wnt3 to Fzd1. To test this, we  
279 knocked down the expression of *lrp5* using morpholinos (Mo) and checked for Wnt3-Fzd1 inter-  
280 actions in the MHB and dorsal cerebellum. We did not detect any cross-correlations after Mo  
281 treatment in these regions, whereas cross-correlations were obtained in the corresponding regions



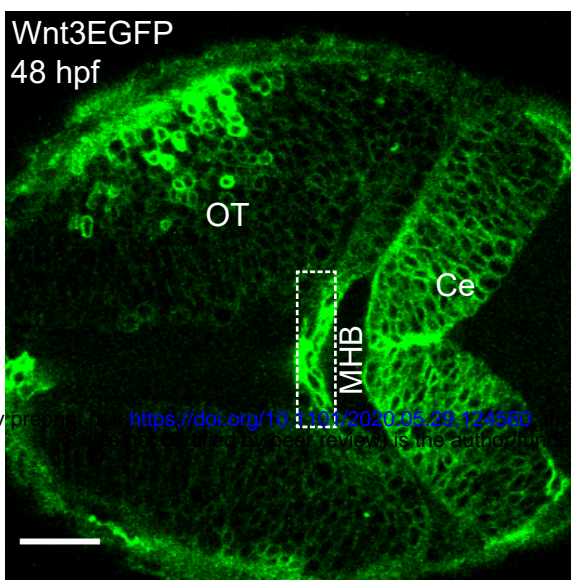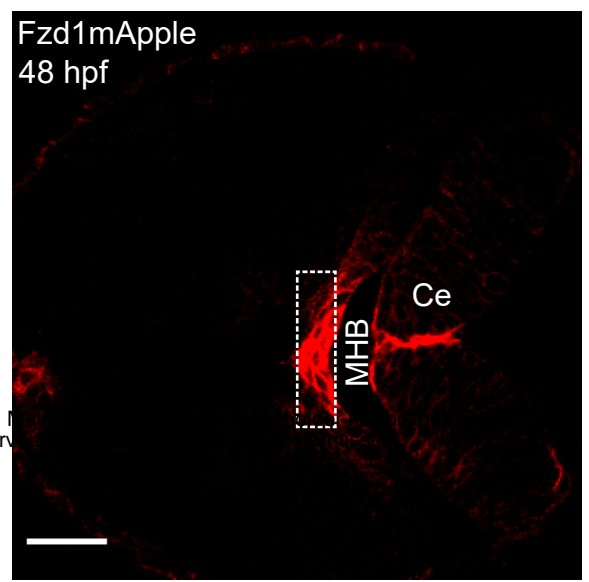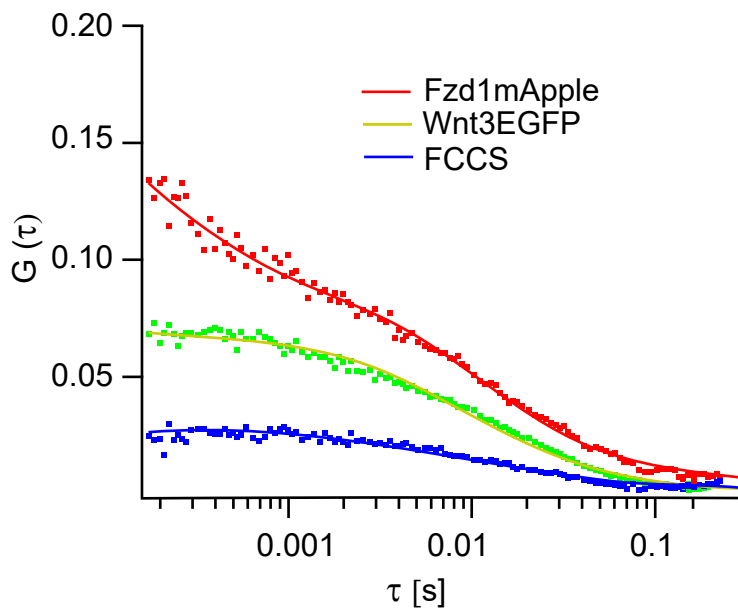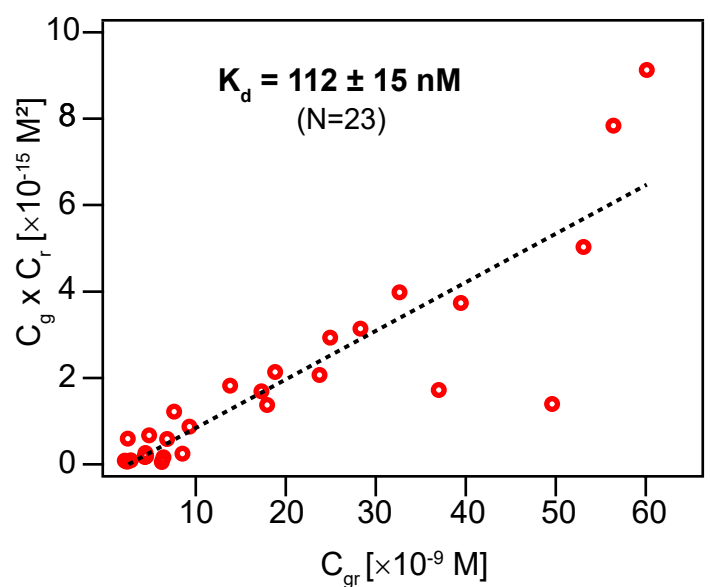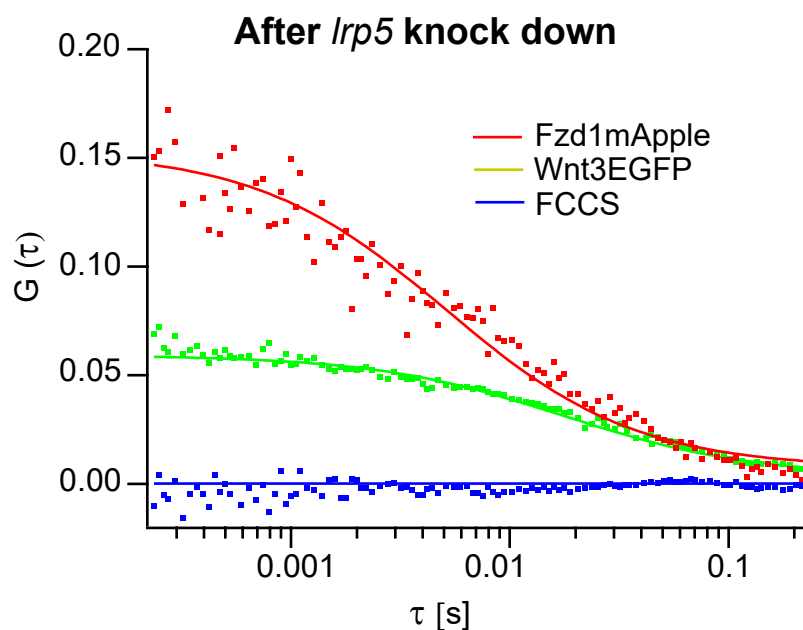

### Figure 6: Determination of *in vivo* Wnt3-Fzd1 binding affinity by FCCS.

Expression of (A) Wnt3EGFP and (B) Fzd1mApple in the double transgenic [Tg(-4.0*wnt3*:Wnt3EGFP) × Tg(-4.0*wnt3*:Fzd1mApple)]. (C) Representative auto- and cross-correlation functions (dots) and fittings (lines) of a Wnt3EGFP-Fzd1mApple measurement at the indicated region. The cross-correlation function indicates Wnt3 interacts with Fzd1 *in vivo*. (D) Determination of apparent dissociation constant ( $K_d$ ) for Wnt3EGFP-Fzd1mApple interaction *in vivo*.  $C_g$ ,  $C_r$ , and  $C_{gr}$  represent the concentration of unbound Wnt3EGFP, unbound Fzd1mApple and bound Wnt3-Fzd1 molecules respectively. The estimated apparent  $K_d$  [ $K_d = (C_g * C_r) / C_{gr}$ ] for Wnt3-Fzd1 *in vivo* is  $112 \pm 15$  nM (N=23,  $R^2 = 0.85$ ). (E) Representative auto- and cross-correlation functions (dots) and fittings (lines) of a Wnt3EGFP-Fzd1mApple measurement after knocking down of the expression of *lrp5*. No cross-correlation indicates Wnt3-Fzd1 interaction is abolished after knockdown of *lrp5*. Scale bars 30  $\mu$ m.

282 for untreated embryos (**Figure 6E**). When we performed FRAP experiments for the Mo-injected  
283 embryos, we obtained a faster recovery of  $\sim 2$  minutes for Wnt3EGFP in the photobleached regions  
284 with a  $D_{\text{eff}}$  of  $3 \pm 0.8 \mu\text{m}^2/\text{s}$  (**Supplementary Figure 6**). These results suggest that the co-receptor  
285 Lrp5 is essential for *in vivo* interaction of Wnt3 with Fzd1 and that this interaction influences Wnt3  
286 diffusion.

287

## 288 Discussion

289 Symmetry breaking and the development of an embryo into an organism requires a finely balanced  
290 but robust position-sensitive control of cell behavior and differentiation. This is achieved by sig-  
291 naling molecules that are expressed in well-defined source regions and distribute to target tissues  
292 where they are recognized by their cognate receptors. Wnts are a class of molecules that fulfil this  
293 function and are involved in cell division, cell migration, apoptosis, embryonic axis induction, cell  
294 fate determination, and maintenance of stem cell pluripotency (Clevers & Nusse, 2012; Logan &  
295 Nusse, 2004). Misregulation of this process leads to developmental defects and diseases, including  
296 cancer. In this work, we investigated the *in vivo* action mechanism of Wnt3, a member of this  
297 family that is involved in the proliferation and differentiation of neural cells, with particular atten-  
298 tion to the differentiation of source and target regions, the mode of transport and the recognition  
299 of Wnt3 at the target site.

300 First, we analyzed the colocalization of Wnt3EGFP and PMTmApple expression in the double  
301 transgenic [Tg(-4.0wnt3:Wnt3EGFP)  $\times$  Tg(-4.0wnt3:PMTmApple)] to map Wnt3 source and dis-  
302 tal target regions at 24 hpf and 48 hpf. We categorized the MHB, midbrain roof plate, floor plate,  
303 epithalamus, and dorsal regions of the cerebellum as the source regions for Wnt3. Interestingly,  
304 earlier studies had documented these regions as the primary signaling centers that control the de-  
305 velopment of the central nervous system (CNS). The brain midline, comprising of the roof plate  
306 and floor plate, represent the signaling glia that acts as the source of several secreted signals in-  
307 volved in the neuronal specification (Chizhikov et al., 2006; Jessell TM, 2000; Kondrychyn et al.,  
308 2013). Chizhikov and Millen provided a comprehensive overview on how the roof plate governs  
309 the specification of the hindbrain, diencephalon, telencephalon and spinal cord by producing BMP  
310 and Wnt proteins (Chizhikov & Millen, 2005). Similarly, the importance of the MHB (also known

311 as the isthmus organizer) in the morphogenesis of the zebrafish brain is also well studied (Gibbs et  
312 al., 2017; Raible & Brand, 2004; Wurst & Bally-Cuif, 2001). Our results, at a molecular level,  
313 corroborate these functional studies, which examine the role of these signaling centers in coordi-  
314 nating brain development by producing critical signaling molecules.

315 While whole-mount *in situ* hybridization (WISH) is useful for visualizing the spatial gene expres-  
316 sion patterns on fixed embryos at the level of mRNA, it does not provide information regarding  
317 the distribution of signaling proteins in live samples. Our approach based on the analysis of the  
318 distribution of proteins *in vivo* enabled us to validate not only the source regions, but also identify  
319 the ventral regions of the cerebellum and optic tectum as the target regions to where Wnt3 is trans-  
320 ported. However, the whole list of Wnt3 target sites could be longer. Recently, it was shown that  
321 Wnt5A transported in the cerebrospinal fluid regulates the development of the hindbrain (Kaiser  
322 et al., 2019). Since previously we also detected Wnt3 diffusing in the brain ventricles (Teh et al.,  
323 2015), further detailed investigation is required to detect additional less obvious target sites. Nev-  
324 ertheless, the characterization of Wnt3 source and target regions of this work clearly indicates the  
325 presence of discrete Wnt3 producing- and receiving-cells in the developing brain of zebrafish em-  
326 bryos.

327 Second, we investigated the transport mechanism of Wnt3 in the zebrafish brain. The transport  
328 mechanism not only influences signaling and function, but is of particular interest for Wnts as it is  
329 not clear how they can distribute over long distances despite their hydrophobic nature. Using FCS,  
330 we first quantified the *in vivo* dynamics of Wnt3EGFP along the cell boundaries and in the brain  
331 ventricle. In the brain ventricle we found two different diffusing components of  $54.6 \pm 11.3 \mu\text{m}^2/\text{s}$   
332 and a slow component with  $D_{\text{slow}}$  of  $4.8 \pm 3.4 \mu\text{m}^2/\text{s}$  (**Figure 4E**). The first component is similar  
333 to secEGFP and is consistent with freely diffusing Wnt3EGFP, or at best Wnt3EGFP in a very  
334 small complex, e.g. with a shuttling protein that hides the hydrophobic Wnt3 moiety and prevents  
335 Wnt3 aggregation. The second component is much slower and hints at Wnt3EGFP associated with  
336 larger protein or lipid complexes and would be consistent with either exosomes or protein transport  
337 complexes. It will be interesting to address the exact nature of the aggregation and/or complexation  
338 state of Wnt3 in future studies. At the cell boundaries, we found two diffusive components for all  
339 Wnt3EGFP measurements, one that is consistent with membrane diffusion ( $D_{\text{slow}} = 0.6 \pm 0.3$   
340  $\mu\text{m}^2/\text{s}$ ) and another component ( $D_{\text{fast}} = 27.6 \pm 3.9 \mu\text{m}^2/\text{s}$ ) too fast to be attributed to diffusion within

341 a lipid bilayer and much closer to the diffusion coefficient seen for secEGFP ( $D = 57.9 \pm 14.4$   
342  $\mu\text{m}^2/\text{s}$ ). Due to resolution limitations of FCS, we could not unambiguously attribute this compo-  
343 nent to secreted Wnt3EGFP, as cytosolic Wnt3EGFP could also contribute to the fast diffusing  
344 component. Since Wnt3 has been shown to interact with HSPG (Fuerer et al., 2010; Kirkpatrick  
345 & Selleck, 2007; Mii et al., 2017), we disrupted HSPG by heparinase injection, which should  
346 influence only extracellular Wnt3 but not a putative cytosolic component. In subsequent measure-  
347 ments,  $D_{\text{fast}}$  for Wnt3EGFP increased to  $43.4 \pm 7.6 \mu\text{m}^2/\text{s}$  upon heparinase treatment indicating  
348 that Wnt3 spreads by extracellular diffusion.

349 FRAP experiments conducted at 48 hpf as target region and multiple cell diameters removed from  
350 the source region corroborate these results. Fluorescence recovery took place within 7 minutes  
351 indicating transport over long distances. However, the estimated effective diffusion coefficient of  
352 Wnt3EGFP was only  $0.5 \pm 0.2 \mu\text{m}^2/\text{s}$ , a factor  $\sim 50$ -100 lower than the diffusion coefficient in the  
353 interstitial spaces measured by FCS ( $27.6 \pm 3.9 \mu\text{m}^2/\text{s}$ ). This is in stark contrast to the secEGFP  
354 global diffusion coefficient which was estimated to be  $13 \pm 4 \mu\text{m}^2/\text{s}$ , and was reduced by only  
355 about a factor 3-5 compared to FCS measurements of the same molecule ( $57.9 \pm 14.4 \mu\text{m}^2/\text{s}$ ). This  
356 smaller reduction in the global versus the local diffusion coefficient for secEGFP, as measured by  
357 FCS and FRAP respectively, could be an effect of tortuosity (Müller et al., 2013). However, the  
358 much larger reduction of the global diffusion coefficient for Wnt3EGFP calls for a different ex-  
359 planation, possibly including transient binding to its receptors and HSPG (Müller et al., 2013).  
360 Subsequent experiments showed that HSPG disruption by heparinase increased Wnt3EGFP diffu-  
361 sion by a factor  $\sim 2$  (FCS), and *lrp5* knockdown increased the Wnt3EGFP global diffusion coeffi-  
362 cient by a factor  $\sim 5$ -6. Overall this accounts for a reduction of global Wnt3EGFP diffusion by at  
363 least a factor 30-60, consistent with the 50-100 fold reduction seen by the comparison of short-  
364 range (FCS) and long-range (FRAP) diffusion of Wnt3 in native conditions. Hence, our FCS and  
365 FRAP results collectively implicate the extracellular diffusion of Wnt3 mediated by HSPG and  
366 receptor binding to accomplish long-range dispersal in the developing zebrafish brain.

367 However, it must be noted that Wnt3 might additionally assume other modes of spreading. It is  
368 possible that carrier proteins or exosomes also shuttle Wnt3 in the zebrafish brain as would be  
369 consistent with the second slow component of Wnt3EGFP diffusion found in the brain ventricle.  
370 Moreover, HSPG may also assist in the transfer of Wnt bearing exosomes or lipoproteins by acting

371 as their binding sites. A study demonstrated how HSPG guides the clearance of very low-density  
372 lipoprotein (VLDL) by forming a complex with Lrp (Wilsie & Orlando, 2003). Correspondingly,  
373 Eugster et al., explained how the interaction of the *Drosophila* lipoprotein with HSPG might in-  
374 fluence the long-range signaling of Hedgehog in *Drosophila* (Eugster et al., 2007). On the same  
375 note, it was also determined how the functional activity of exosomes and vesicles is dependent on  
376 HSPG (Christianson & Belting, 2014). Thus, a detailed investigation is required to confirm if  
377 HSPG aids the transport of Wnt3 packaged in exosomes or lipoproteins in the zebrafish brain.  
378 Nevertheless, our findings illustrate how HSPG moderates the long-range extracellular spreading,  
379 and by extension the function, of Wnt3 in the zebrafish brain.

380 Once Wnt ligands reach the target cells, the next question is how they interact with their target  
381 receptors. As we had established that it is highly unlikely for Wnts to diffuse in the interstitial  
382 spaces freely, they must be released from their chaperones or HSPG in order to interact with their  
383 receptors. One possible hand-off mechanism is the competitive binding of Wnts to their target  
384 receptors with a higher binding affinity (Naschberger et al., 2017; Wilson, 2017). Furthermore, the  
385 binding affinity of the Wnt-receptor complex also modulates their range and magnitude *in vivo*.  
386 Hence, we measured the *in vivo* binding affinity for Wnt3 with a potential target receptor, Fzd1  
387 using quasi-PIE FCCS. We obtained an apparent  $K_d$  of  $112 \pm 15$  nM *in vivo*, implying a strong  
388 interaction. However, the actual  $K_d$  might be even lower as the concentration of the endogenous  
389 proteins, and the photophysics of the fluorophore affects the estimated  $K_d$  (Foo et al., 2012). None-  
390 theless, it is an estimate of the native *in vivo* Wnt3-Fzd1 binding in their physiological condition,  
391 which is consistent with results of *in vitro* experiments (Dijksterhuis et al., 2015). Interestingly,  
392 we also noticed that the interaction of Wnt3 with Fzd1 was dependent on the expression of the co-  
393 receptor Lrp5. We did not detect any cross-correlations when the expression of *lrp5* was knocked  
394 down and the  $D_{\text{eff}}$  for Wnt3EGFP increased by a factor  $\sim 3$ -5. From this result, it appears that LRP5  
395 is an essential component in facilitating the interaction of Wnt3 with Fzd1 with a significant influ-  
396 ence on the diffusion coefficient and the long-range spreading of Wnt3. Hence, it is of interest to  
397 measure the  $K_d$  for Wnt3-LRP5 in the future and verify if the co-receptor is involved in the hand-  
398 off of Wnt from the carrier proteins and HSPG to its receptor. Note that Fzd1mApple expression  
399 in our transgenic line was driven by a 4 kb Wnt3 promoter that mimicked the regular expression  
400 of Wnt3. While useful methodologically to measure auto- and juxtacrine interactions of Wnt3-

401 Fzd1, additional work is needed in measuring the *in vivo* binding affinities for Wnt3 with Fzd  
402 receptors expressed under the control of their native promoters.

403 In conclusion, our results show the presence of distinct Wnt3 source and target regions in the  
404 developing zebrafish brain, and that Wnt3 is distributed from its source to target by extracellular  
405 diffusion. We observed that the diffusion of Wnt3 is retarded by a factor 3-5 due to tortuosity, a  
406 factor 5-6 due to receptor binding and a factor ~2 due to HSPG, thus leading to a total reduction  
407 of a factor 30-60 when comparing Wnt3EGFP short-range ( $\sim 28 \mu\text{m}^2/\text{s}$  as measured by FCS) to  
408 long-range diffusion ( $\sim 0.5 \mu\text{m}^2/\text{s}$  as measured by FRAP). This indicates that the major part if not  
409 all the reduction seen for long-range compared to short-range diffusion of Wnt3 is explainable by  
410 tortuosity, receptor binding and interactions with HSPG present in the interstitial spaces.

411 Finally, we demonstrated that the co-receptor Lrp5 drives the *in vivo* interaction of Wnt3 with  
412 Fzd1, and quantitatively determined their affinity. This demonstrates that the presence of proteins  
413 alone, be it signaling molecules or receptors, as determined by fluorescence microscopy does not  
414 report on the actual signaling but it is necessary to measure interactions or downstream signaling  
415 to differentiate the concentration from the functional distribution of signaling molecules. Overall,  
416 our findings provide a general outline of Wnt3 signaling in the zebrafish brain from expression  
417 and transport to target binding, which set a starting point for the quantitative investigation of the  
418 Wnt3 interaction network during zebrafish brain development.

419

420

## 421 **Acknowledgements**

422 We thank the NUS Centre for BioImaging Sciences, SingaScope, and the Institute of Molecular  
423 and Cell Biology for providing microscope facility support and providing zebrafish care. TW  
424 acknowledges funding by the Singapore Ministry of Education (MOE2016-T3-1-005). SV is sup-  
425 ported by a NUS Research Scholarship. We thank David Piston for providing the construct of  
426 mApple.

427

428

## 429 Author Contributions

430 SV and TW designed the experiments, analyzed and interpreted the results. SV performed the  
 431 imaging, FCS and FRAP experiments. CT, VK and IK designed and generated the transgenic  
 432 zebrafish lines. SZ performed the colocalization analysis. SV and TW wrote the manuscript and  
 433 TW, VK, CT, SZ and PTM contributed in manuscript revision.

434

## 435 Materials and Methods

### 436 Fluorescence correlation spectroscopy

437 The molecular movement of fluorescently labeled molecules will cause fluorescence fluctuations  
 438 during their entry and exit in a small open observation volume. These fluctuations contain the  
 439 information about the dynamics of these molecules. In confocal FCS the confocal volume of the  
 440 microscope setup defines the observation volume. The measured intensity trace is autocorrelated  
 441 to extract the average concentrations and diffusion coefficients of the molecule in the sample. The  
 442 autocorrelation function (ACF),  $G(\tau)$ , is given by

$$443 \quad G(\tau) = \frac{\langle F(t) \cdot F(t + \tau) \rangle}{\langle F(t) \rangle \cdot \langle F(t + \tau) \rangle} \quad (1)$$

444 Where  $F(t)$  is the fluorescence intensity at time  $t$ ,  $\tau$  is the lag time and  $\langle \dots \rangle$  represents time average.  
 445 For a Gaussian illumination profile,  $G(\tau)$  for a three dimensional free diffusion process with a  
 446 single component and triplet state can be written as

$$447 \quad G(\tau)_{3D,1p,1t} = \frac{1}{N} \cdot \left(1 + \frac{\tau}{\tau_d}\right)^{-1} \cdot \left[1 + \frac{1}{K^2} \left(\frac{\tau}{\tau_d}\right)\right]^{-\frac{1}{2}} \cdot f_{trip}(\tau) + G_\infty \quad (2)$$

448 Here,  $N$  is the mean number of molecules in the observation volume and is inversely proportional  
 449 to the amplitude of the ACF  $G(0)$ ;  $\tau_d$  is the diffusion time of the molecule;  $G_\infty$  is the convergence  
 450 at long lag times;  $K$  is the structure factor which denotes the shape of the confocal volume

$$451 \quad K = \frac{\omega_z}{\omega_{xy}} \text{ and } V_{eff} = \pi^{3/2} \omega_{xy}^2 \omega_z \quad (3)$$

452 where  $\omega_z$  and  $\omega_{xy}$  are the  $1/e^2$  radii of the PSF in the axial and radial direction; and  $f_{trip}(\tau)$  is the  
 453 triplet function which accounts for the fraction of particles in the triplet state ( $F_{trip}$ ) with a triplet  
 454 relaxation time of  $\tau_{trip}$ , and it is represented as

$$455 \quad f_{trip}(\tau) = 1 + \frac{F_{trip}}{1 - F_{trip}} e^{-\frac{\tau}{\tau_{trip}}} \quad (4)$$

456 If two diffusing components are present, then the correlation function for two component 3D dif-  
 457 fusion process  $G(\tau)_{3D,2p,1t}$  is

$$458 \quad G(\tau)_{3D,2p,1t} = \frac{1}{N} \left\{ (1 - F_2) \left(1 + \frac{\tau}{\tau_{d1}}\right)^{-1} \left[1 + \frac{1}{K^2} \left(\frac{\tau}{\tau_{d1}}\right)\right]^{-\frac{1}{2}} + F_2 \left(1 + \frac{\tau}{\tau_{d2}}\right)^{-1} \left[1 + \frac{1}{K^2} \left(\frac{\tau}{\tau_{d2}}\right)\right]^{-\frac{1}{2}} \right\} f_{trip}(\tau) + G_\infty \quad (5)$$

459 Where  $F_2$  is the fraction of the second component. For a 2D diffusion process such as on a mem-  
 460 brane, the fitting equations (2) and (5) become

$$461 \quad G(\tau)_{2D,1p,1t} = \frac{1}{N} \cdot \left(1 + \frac{\tau}{\tau_d}\right)^{-1} \cdot f_{trip}(\tau) + G_\infty \quad (6)$$

$$462 \quad G(\tau)_{2D,2p,1t} = \frac{1}{N} \left\{ (1 - F_2) \left(1 + \frac{\tau}{\tau_{d1}}\right)^{-1} + F_2 \left(1 + \frac{\tau}{\tau_{d2}}\right)^{-1} \right\} f_{trip}(\tau) + G_\infty \quad (7)$$

463 For FCS measurements, the system was first calibrated with Atto 488 dye for 488 nm and 485 nm  
 464 laser lines and Atto 565 for 543 nm laser line. The known diffusion coefficient for the dye was  
 465  $400 \mu\text{m}^2/\text{s}$  at room temperature. The obtained correlation function was fit using equation (2) and  
 466 the free fit parameters were  $N$ ,  $\tau$ ,  $\tau_{trip}$ ,  $F_{trip}$  and  $G_\infty$ . The  $K$  value and  $V_{\text{eff}}$  were calculated using  
 467 equation (3). The samples were dechorionated, anesthetized by Tricaine and mounted in 1% low  
 468 melt agarose in a No. 1.5 glass bottom MatTek petri dishes. The acquisition time for the measure-  
 469 ments was 60 s and all measurements were performed at room temperature. For FCS measurements  
 470 along the cell borders in Wnt3EGFP, LynEGFP, PMTmApple and Fzd1mApple expressing em-  
 471 bryos, we used 2D-2particle-1triplet model (equation 7), and 2D-1particle-1triplet model (equation  
 472 2) in secEGFP expressing embryos. The measurements for Wnt3EGFP in the brain ventricle were  
 473 fit using 3D-2particle-1triplet model (equation 5) and for secEGFP using 3D-1particle-triplet  
 474 model (equation 2). The fit models were determined the Bayes inference-based model selection  
 475 (Sun et al., 2015).

476



477 **Quasi PIE Fluorescence cross-correlation spectroscopy**

478 FCCS is a valuable tool to study biomolecular interactions in live samples. When two interacting  
 479 molecules tagged with spectrally different fluorophores transit through the observation volume,  
 480 the intensity fluctuations from the two channels can be cross-correlated to obtain the cross-corre-  
 481 lation function  $G_x(\tau)$  given by:

$$482 \quad G_x(\tau) = \frac{\langle F_g(t) \cdot F_r(t + \tau) \rangle}{\langle F_g(t) \rangle \cdot \langle F_r(t) \rangle} \quad (8)$$

483 Where  $F_g$  and  $F_r$  are the fluorescence intensity in the green and red channel respectively.

484 For our FCCS measurements to detect Wnt3-Fzd1 interactions, we used an interleaved pulsed 485  
 485 nm laser line and a continuous wave 543 nm laser line to obtain the auto- and cross-correlation  
 486 functions. This allowed us to apply statistical filtering (Kapusta et al., 2012) which helped in elim-  
 487 inating spectral cross-talk, background signal and detector after-pulsing based on fluorescence  
 488 lifetime correlation spectroscopy (FLCS) as detailed in Parra et al., 2011 (Padilla-Parra et al.,  
 489 2011). This is called quasi-PIE FCCS (Yavas et al., 2016).

490 Taking into account the background and spectral cross-talk, the amplitude of the ACF in the green  
 491 channel  $G_G(0)$ , red channel  $G_R(0)$ , and the amplitude of the CCF  $G_x(0)$  can be written as:

$$493 \quad G_G(0) = \frac{(\eta_{g,G})^2 C_g + (\eta_{r,G})^2 C_r + (q_g \eta_{g,G} + q_r \eta_{r,G})^2 C_{gr}}{N_A V_{eff} \left[ \eta_{g,G} C_g + \eta_{r,G} C_r + (q_g \eta_{g,G} + q_r \eta_{r,G}) C_{gr} + \frac{\beta_G}{N_A V_{eff}} \right]^2} \quad (9)$$

$$494 \quad G_R(0) = \frac{(\eta_{g,R})^2 C_g + (\eta_{r,R})^2 C_r + (q_g \eta_{g,R} + q_r \eta_{r,R})^2 C_{gr}}{N_A V_{eff} \left[ \eta_{g,R} C_g + \eta_{r,R} C_r + (q_g \eta_{g,R} + q_r \eta_{r,R}) C_{gr} + \frac{\beta_R}{N_A V_{eff}} \right]^2} \quad (10)$$

$$495 \quad G_x(0) = \frac{\eta_{g,R} \eta_{g,G} C_g + \eta_{r,G} \eta_{r,R} C_r + (q_g \eta_{g,G} + q_r \eta_{r,G})(q_g \eta_{g,R} + q_r \eta_{r,R}) C_{gr}}{N_A V_{eff} \left[ \eta_{g,G} C_g + \eta_{r,G} C_r + (q_g \eta_{g,G} + q_r \eta_{r,G}) C_{gr} + \frac{\beta_G}{N_A V_{eff}} \right]} \quad (11)$$

$$\times \left[ \eta_{g,R} C_g + \eta_{r,R} C_r + (q_g \eta_{g,R} + q_r \eta_{r,R}) C_{gr} + \frac{\beta_R}{N_A V_{eff}} \right]$$

496

497 Here  $\eta_{g,G}$  and  $\eta_{r,R}$  represent the mean counts per particle per second (cps) for EGFP in the green  
 498 and mApple in the red channel respectively. For our samples we obtained a  $\eta_{g,G}$  of  $\sim 1900$  Hz and  
 499  $\eta_{r,R}$  of  $\sim 1400$  Hz.  $\beta_G$  and  $\beta_R$  represent the count rates of background collected in the green and  
 500 red channel respectively.  $\beta_R$  measured from blank WT embryo was  $\sim 400$  Hz while FLCS correc-  
 501 tion eliminated the background in the green channel ( $\beta_G = 0$ ).  $N_A$  is the Avogadro's number and  
 502  $V_{\text{eff}}$  represents the effective confocal volume from calibration.  $\eta_{r,G}$  and  $\eta_{g,R}$  denotes the cross-talk  
 503 in the green and red channel respectively, which was efficiently eliminated by quasi PIE FCCS  
 504 ( $\eta_{r,G}$  and  $\eta_{g,R} = 0$ ).  $q_g$  and  $q_r$  are the correction factors due to FRET and quenching. Since the  
 505 cps for Wnt3EGFP and Fzd1mApple in their respective transgenics were same as that in double  
 506 transgenic line,  $q_g$  and  $q_r$  were set to 1. Equations 9, 10 and 11 were solved for  $C_g$ ,  $C_r$  and  $C_{gr}$ , which  
 507 denote the concentration of the free green, free red and bound molecules in the observation volume  
 508 respectively. Using  $C_g$ ,  $C_r$  and  $C_{gr}$  the dissociation constant ( $K_d$ ) for the interaction which can be  
 509 determined using equation 12:

510

$$K_d = \frac{C_g \cdot C_r}{C_{gr}} \quad (12)$$

511

## 512 Confocal microscope setup

513 An Olympus FV 1200 laser scanning confocal microscope (IX83; Olympus, Japan) integrated with  
 514 a PicoQuant time resolved LSM upgrade kit (Microtime 200; GmbH, Germany) was used in this  
 515 work. The sample was illuminated using a 488 nm laser beam (for EGFP) and 543 nm laser beam  
 516 (for mApple) which was reflected to the back focal plane of an Olympus UPLSAPO 60X/1.2 NA  
 517 water immersion objective. For all the experiments, the intensity of the laser before the objective  
 518 was  $20 \mu\text{W}$ . The emitted signal passes through a  $120 \mu\text{m}$  pinhole before being filtered by an Olym-  
 519 pus 510/23 emission filter (for EGFP) and Olympus 605/55 emission filter (for mApple) and even-  
 520 tually directed to a PMT detector for imaging. For FCS measurements, 510/23 emission filter  
 521 (Semrock, USA) and 615DF45 filter (Semrock, USA) were used, and the filtered emissions were

522 recorded using a single photon sensitive avalanche photodiodes (SAPD) (SPCM-AQR- 14; Perki-  
523 nElmer). The recorded signal then processed using SymPhoTime 64 (PicoQuant, Germany) to  
524 compute the autocorrelation function. For FCCS measurements, the sample was simultaneously  
525 illuminated with a pulsed 485 nm laser (LDH-D-C-488; PicoQuant) operated at 20 MHz repetition  
526 rate and a continuous 543 nm laser. The emission was separated using 560 DCLP dichroic mirror  
527 and directed to the 510/23 emission filter (Semrock, USA) and the 615DF45 filter (Semrock,  
528 USA). The signal recorded by SAPD was then analyzed by Synphotime to generate the auto- and  
529 cross-correlations.

530

### 531 **Colocalization analysis**

532 For the colocalization analysis of Wnt3EGFP and PMTmApple, confocal z-stacks of step size 0.5  
533  $\mu\text{m}$  were obtained with identical acquisition settings. An automatic threshold algorithm detailed  
534 in Zhu et al., 2016 (Zhu et al., 2016) was implemented to segment the data. The algorithm uses the  
535 correlation quotient to select an optimal threshold for segmentation as described in (Li et al., 2004).  
536 Following the segmentation, the colocalization for each pixel was calculated based on intensity  
537 correlation analysis (ICA), the distance weight and intensity weight (Li et al., 2004; Zhu et al.,  
538 2016). Finally, a pair of masks for the colocalized and non-colocalized pixels were generated. The  
539 colocalized pixels and non-colocalized pixels were used to construct 3D images of the source and  
540 target regions respectively. The 3D images were built using '3D View' module Imaris 9.5.0. The  
541 display setting was set to white background color and the 3D reconstructed images were repre-  
542 sented in 'Normal Shading' mode for improving contrast in Figures 2, 3 and Videos 2, 3.

543

### 544 **Fluorescence recovery after photo bleaching (FRAP)**

545 FRAP measurements were performed on an Olympus FV3000 laser scanning microscope. The  
546 mounted samples were imaged with a UPLSAPO 60X/1.2 NA water immersion objective using a  
547 488 nm diode laser (for Wnt3EGFP and secEGFP) or a 561 nm diode laser (for PMTmApple). A  
548 DM 405/488/561/640 dichroic mirror separated the excitation and emission beams. The signal  
549 from the sample, after passing through the dichroic mirror was filtered by a BP 510-550 emission  
550 band pass filter for the 488 nm laser beam, and by a BP 575-625 emission band pass filter for the

551 561 nm laser beam. The pinhole size was adjusted to 1 AU. For FRAP, 5 pre-bleach frames were  
552 obtained before irreversibly photo bleaching a circular region of interest (ROI) for 30 seconds. The  
553 fluorescence intensity recovery in the photobleached region was recorded for 30 minutes. The  
554 images were then analyzed using the FRAP module in the Olympus CellSens software. A reference  
555 region on the sample but outside the ROI was selected to correct for photo bleaching, and another  
556 reference region outside the sample was selected for background correction. The software then  
557 plotted a FRAP recovery curve for the ROI, fitted the FRAP curve with a double exponential fit  
558 to obtain the recovery time for the fast ( $\tau_{fast}$ ) and the slow ( $\tau_{slow}$ ) component. The diffusion coeffi-  
559 cient ( $D_{eff}$ ) was calculated using the Soumpasis equation (eq 13) for 2D circular bleaching of radius  
560  $r$  (Kang et al., 2015; Koppel et al., 1976). However, it must be noted that this is an apparent esti-  
561 mate of  $D_{eff}$  as the distribution of fluorophores is not homogeneous, and we assume there is no  
562 diffusion during photo bleaching process.

$$563 \quad D_{eff} = \frac{r^2}{4\tau_{fast}} \quad (13)$$

564

### 565 **Generation of transgenic lines and zebrafish maintenance**

566 To generate Tg(-4.0*wnt3*:PMTmApple) transgenic zebrafish, the 45 bp plasma membrane target-  
567 ing-sequence (PMT) (ATGGGCTGCTTCTTCAGCAAGCGGCGGAAGGCCGACAAGGA-  
568 GAGC) was cloned upstream and in-frame with mApple to generate PMTmApple open reading  
569 frame (ORF). The DNA fragment was subcloned into the 4-kbWnt3EGFP-miniTol2 recombinant  
570 plasmid (Teh et al., 2015) using Gibson assembly by replacing the Wnt3EGFP ORF with  
571 PMTmApple to give 4-kbPMT-mApple-miniTol2 recombinant plasmid.

572 To generate Tg(-4.0*wnt3*:Fzd1mApple), zebrafish *fzd1* ORF (1617 bp ; ENSDARG00000106062)  
573 was amplified by RT-PCR and subcloned into pGemTeasy. The Fzd1mApple DNA fragment was  
574 constructed by removing the Fzd1 stop codon and inserting in-frame (GGGS)<sub>2</sub> linker sequence  
575 (GGAGGAGGATCAGGAGGAGGATCA) tagged with mApple to Fzd1 C terminal by Gibson  
576 assembly. This DNA fragment was then subcloned into the 4-kbWnt3EGFP-miniTol2 recombi-  
577 nant plasmid using Gibson assembly by replacing the Wnt3EGFP ORF with Fzd1mApple to give  
578 4-kbFzd1mApple-miniTol2 recombinant plasmid.

579 Stable *wnt3* promoter-driven transgenic lines were generated as stated (Balciunas et al., 2006) by  
580 co-injection of transposase mRNA and 4-kbPMT-mApple-miniTol2 recombinant plasmid; co-in-  
581 jection of transposase mRNA and 4-kbFzd1mApple-miniTol2 recombinant plasmid, to generate  
582 Tg(-4.0*wnt3*:PMTmApple) and Tg(-4.0*wnt3*:Fzd1mApple) transgenic lines respectively.

583 Additional transgenic lines used are Tg(-8.0*cldnB*:lynEGFP) for *in vivo* imaging of membrane-  
584 tethered EGFP expression in the cerebellum (Haas & Gilmour, 2006). Wnt3EGFP expression in  
585 the brain was imaged using Tg(-4.0*wnt3*:Wnt3EGFP)F2 (Teh et al., 2015).

586 Transgenic adult zebrafish and embryos were obtained from zebrafish facilities in the Institute of  
587 Molecular and Cell Biology (Singapore) and National University of Singapore. The Institutional  
588 Animal Care and Use Committee (IACUC) in Biological Resource Center (BRC), A\*STAR, Sin-  
589 gapore (IACUC #161105) and the National University of Singapore (IACUC# BR18-1023) have  
590 approved the entire study. Spawnd transgenic embryos were staged as described (Kimmel et al.,  
591 1995). Embryos older than 30 hpf were treated with 1-phenyl-2-thiourea at 18 hpf to prevent for-  
592 mation of melanin.

593

#### 594 **Morpholino injection**

595 The injected dose of *lrp5* splice-blocking Morpholinos (MOs; Gene Tools, Corvallis, USA)  
596 *lrp5*MoUp (AGCTGCTCTTACAGTTTGTAGAGAG) targeting the Exon2-Intron2 splice junc-  
597 tion and *lrp5*MoDown (CCTCCTTCATAGCTGCAAAAACAAG) targeting the Intron2-Exon3  
598 splice junction were conducted in accordance to published research (Willems et al., 2015).

599

#### 600 **Heparinase injection into the zebrafish brain ventricle**

601 Heparinase I from *Flavobacterium heparinum* (Merck) was dissolved in PBS to 1U/ $\mu$ l and stored  
602 as frozen aliquots. For microinjection into the brain ventricle, MS-222 (Merck) anesthetized 48hpf  
603 zebrafish embryos were laterally mounted in 1% low gelling agarose (Merck). Reaction mix con-  
604 taining 0.1U/ $\mu$ L heparinase I and 70,000 MW Dextran-Tetramethylrhodamine (ThermoFisher Sci-  
605 entific) was injected into the 4th ventricle of immobilized embryo. Injected embryos were freed  
606 from agarose and allowed to recover in glass bottomed dishes prior to imaging.

607 **References**

- 608 Anne, S. L., Govek, E.-E., Ayrault, O., Kim, J. H., Zhu, X., Murphy, D. A., Van Aelst, L.,  
609 Roussel, M. F., & Hatten, M. E. (2013). WNT3 Inhibits Cerebellar Granule Neuron  
610 Progenitor Proliferation and Medulloblastoma Formation via MAPK Activation. *PLOS*  
611 *ONE*, 8(11), e81769. <https://doi.org/10.1371/journal.pone.0081769>
- 612 Azbazar, Y., Ozalp, O., Sezgin, E., Veerapathiran, S., Duncan, A. L., Sansom, M. S. P.,  
613 Eggeling, C., Wohland, T., Karaca, E., & Ozhan, G. (2019). More Favorable Palmitic Acid  
614 Over Palmitoleic Acid Modification of Wnt3 Ensures Its Localization and Activity in  
615 Plasma Membrane Domains. *Frontiers in Cell and Developmental Biology*, 7(November),  
616 1–15. <https://doi.org/10.3389/fcell.2019.00281>
- 617 Baeg, G. H., Selva, E. M., Goodman, R. M., Dasgupta, R., & Perrimon, N. (2004). The Wingless  
618 morphogen gradient is established by the cooperative action of Frizzled and Heparan  
619 Sulfate Proteoglycan receptors. *Developmental Biology*, 276(1), 89–100.  
620 <https://doi.org/10.1016/j.ydbio.2004.08.023>
- 621 Balciunas, D., Wangensteen, K. J., Wilber, A., Bell, J., Geurts, A., Sivasubbu, S., Wang, X.,  
622 Hackett, P. B., Largaespada, D. A., McIvor, R. S., & Ekker, S. C. (2006). Harnessing a high  
623 cargo-capacity transposon for genetic applications in vertebrates. *PLoS Genetics*, 2(11),  
624 1715–1724. <https://doi.org/10.1371/journal.pgen.0020169>
- 625 Bilić, J., Huang, Y. L., Davidson, G., Zimmermann, T., Cruciat, C. M., Bienz, M., & Niehrs, C.  
626 (2007). Wnt induces LRP6 signalosomes and promotes dishevelled-dependent LRP6  
627 phosphorylation. *Science*, 316(5831), 1619–1622. <https://doi.org/10.1126/science.1137065>
- 628 Bulfone, A., Puelles, L., Porteus, M. H., Frohman, M. A., Martin, G. R., & Rubenstein, J. L. R.  
629 (1993). Spatially restricted expression of Dlx-1, Dlx-2 (Tes-1), Gbx-2, and Wnt-3 in the  
630 embryonic day 12.5 mouse forebrain defines potential transverse and longitudinal  
631 segmental boundaries. *Journal of Neuroscience*, 13(7), 3155–3172.  
632 <https://doi.org/10.1523/jneurosci.13-07-03155.1993>
- 633 Callejo, A., Biloni, A., Mollica, E., Gorfinkiel, N., Andrés, G., Ibáñez, C., Torroja, C., Doglio,  
634 L., Sierra, J., & Guerrero, I. (2011). Dispatched mediates Hedgehog basolateral release to  
635 form the long-range morphogenetic gradient in the *Drosophila* wing  
636 disk epithelium. *Proceedings of the National Academy of Sciences*, 108(31), 12591 LP –  
637 12598. <https://doi.org/10.1073/pnas.1106881108>
- 638 Chizhikov, V. V., Lindgren, A. G., Curre, D. S., Rose, M. F., Monuki, E. S., & Millen, K. J.  
639 (2006). The roof plate regulates cerebellar cell-type specification and proliferation.  
640 *Development*, 133(15), 2793–2804. <https://doi.org/10.1242/dev.02441>
- 641 Chizhikov, V. V., & Millen, K. J. (2005). Roof plate-dependent patterning of the vertebrate  
642 dorsal central nervous system. *Developmental Biology*, 277(2), 287–295.  
643 <https://doi.org/10.1016/j.ydbio.2004.10.011>
- 644 Christianson, H. C., & Belting, M. (2014). Heparan sulfate proteoglycan as a cell-surface  
645 endocytosis receptor. *Matrix Biology*, 35, 51–55.  
646 <https://doi.org/10.1016/j.matbio.2013.10.004>

- 647 Chu, M. L. H., Ahn, V. E., Choi, H. J., Daniels, D. L., Nusse, R., & Weis, W. I. (2013).  
648 Structural studies of wnts and identification of an LRP6 binding site. *Structure*, *21*(7),  
649 1235–1242. <https://doi.org/10.1016/j.str.2013.05.006>
- 650 Clements, W. K., Ong, K. G., & Traver, D. (2009). Zebrafish wnt3 is expressed in developing  
651 neural tissue. *Developmental Dynamics*, *238*(7), 1788–1795.  
652 <https://doi.org/10.1002/dvdy.21977>
- 653 Clevers, H., & Nusse, R. (2012). Wnt/ $\beta$ -catenin signaling and disease. *Cell*, *149*(6), 1192–1205.  
654 <https://doi.org/10.1016/j.cell.2012.05.012>
- 655 Coudreuse, D., & Korswagen, H. C. (2007). The making of Wnt: New insights into Wnt  
656 maturation, sorting and secretion. *Development*, *134*(1), 3–12.  
657 <https://doi.org/10.1242/dev.02699>
- 658 Dijksterhuis, J. P., Baljinnyam, B., Stanger, K., Sercan, H. O., Ji, Y., Andres, O., Rubin, J. S.,  
659 Hannoush, R. N., & Schulte, G. (2015). Systematic mapping of WNT-FZD protein  
660 interactions reveals functional selectivity by distinct WNT-FZD pairs. *Journal of Biological*  
661 *Chemistry*, *290*(11), 6789–6798. <https://doi.org/10.1074/jbc.M114.612648>
- 662 Enderlein, J., Gregor, I., Patra, D., Dertinger, T., & Kaupp, U. B. (2005). Performance of  
663 Fluorescence Correlation Spectroscopy for Measuring Diffusion and Concentration.  
664 *ChemPhysChem*, *6*(11), 2324–2336. <https://doi.org/10.1002/cphc.200500414>
- 665 Esteve, P., Sandonis, A., Ibañez, C., Shimono, A., Guerrero, I., & Bovolenta, P. (2011). Secreted  
666 frizzled-related proteins are required for Wnt/ $\beta$ -catenin signalling activation in the  
667 vertebrate optic cup. *Development*, *138*(19), 4179–4184.  
668 <https://doi.org/10.1242/dev.065839>
- 669 Eugster, C., Panáková, D., Mahmoud, A., & Eaton, S. (2007). Lipoprotein-Heparan Sulfate  
670 Interactions in the Hh Pathway. *Developmental Cell*, *13*(1), 57–71.  
671 <https://doi.org/10.1016/j.devcel.2007.04.019>
- 672 Foo, Y. H., Naredi-Rainer, N., Lamb, D. C., Ahmed, S., & Wohland, T. (2012). Factors affecting  
673 the quantification of biomolecular interactions by fluorescence cross-correlation  
674 spectroscopy. *Biophysical Journal*, *102*(5), 1174–1183.  
675 <https://doi.org/10.1016/j.bpj.2012.01.040>
- 676 Fuerer, C., Habib, S. J., & Nusse, R. (2010). A study on the interactions between heparan sulfate  
677 proteoglycans and Wnt proteins. *Developmental Dynamics*, *239*(1), 184–190.  
678 <https://doi.org/10.1002/dvdy.22067>
- 679 Galli, L. M., Barnes, T. L., Secrest, S. S., Kadowaki, T., & Burrus, L. W. (2007). Porcupine-  
680 mediated lipid-modification regulates the activity and distribution of Wnt proteins in the  
681 chick neural tube. *Development*, *134*(18), 3339–3348. <https://doi.org/10.1242/dev.02881>
- 682 Garriock, R. J., Warkman, A. S., Meadows, S. M., D'Agostino, S., & Krieg, P. A. (2007).  
683 Census of vertebrate Wnt genes: Isolation and developmental expression of *Xenopus* Wnt2,  
684 Wnt3, Wnt9a, Wnt9b, Wnt10a, and Wnt16. *Developmental Dynamics*, *236*(5), 1249–1258.  
685 <https://doi.org/10.1002/dvdy.21156>
- 686 Gibbs, H. C., Chang-Gonzalez, A., Hwang, W., Yeh, A. T., & Lekven, A. C. (2017). Midbrain-

- 687 hindbrain boundary morphogenesis: At the intersection of wnt and Fgf signaling. *Frontiers*  
688 *in Neuroanatomy*, 11(August), 1–17. <https://doi.org/10.3389/fnana.2017.00064>
- 689 Greco, V., Hannus, M., & Eaton, S. (2001). Argosomes: A potential vehicle for the spread of  
690 morphogens through epithelia. *Cell*, 106(5), 633–645. <https://doi.org/10.1016/S0092->  
691 8674(01)00484-6
- 692 Haas, P., & Gilmour, D. (2006). Chemokine Signaling Mediates Self-Organizing Tissue  
693 Migration in the Zebrafish Lateral Line. *Developmental Cell*, 10(5), 673–680.  
694 <https://doi.org/10.1016/j.devcel.2006.02.019>
- 695 Herr, P., & Basler, K. (2012). Porcupine-mediated lipidation is required for Wnt recognition by  
696 Wls. *Developmental Biology*, 361(2), 392–402. <https://doi.org/10.1016/j.ydbio.2011.11.003>
- 697 Hikasa, H., & Sokol, S. Y. (2013). Wnt signaling in vertebrate axis specification. *Cold Spring*  
698 *Harbor Perspectives in Biology*, 5(1). <https://doi.org/10.1101/cshperspect.a007955>
- 699 Hirai, H., Matoba, K., Mihara, E., Arimori, T., & Takagi, J. (2019). Crystal structure of a  
700 mammalian Wnt–frizzled complex. *Nature Structural and Molecular Biology*, 26(May).  
701 <https://doi.org/10.1038/s41594-019-0216-z>
- 702 Holzer, T., Liffers, K., Rahm, K., Trageser, B., Özbek, S., & Gradl, D. (2012). Live imaging of  
703 active fluorophore labelled Wnt proteins. *FEBS Letters*, 586(11), 1638–1644.  
704 <https://doi.org/10.1016/j.febslet.2012.04.035>
- 705 Hsieh, J. C., Rattner, A., Smallwood, P. M., & Nathans, J. (1999). Biochemical characterization  
706 of Wnt-frizzled interactions using a soluble, biologically active vertebrate Wnt protein.  
707 *Proceedings of the National Academy of Sciences of the United States of America*, 96(7),  
708 3546–3551. <https://doi.org/10.1073/pnas.96.7.3546>
- 709 Huang, H., & Kornberg, T. B. (2015). Myoblast cytonemes mediate Wg signaling from the wing  
710 imaginal disc and Delta-Notch signaling to the air sac primordium. *ELife*, 4(MAY), 1–22.  
711 <https://doi.org/10.7554/eLife.06114>
- 712 Janda, C. Y., Waghray, D., Levin, A. M., Thomas, C., & Garcia, K. C. (2012). Structural Basis  
713 of Wnt. *Science*, 337(July), 59–64. <https://doi.org/10.1126/science.1222879>.Structural
- 714 Jessell TM. (2000). Neuronal specification in the spinal cord:inductive signals and  
715 transcriptional codes. *Nature Reviews Genetics*, 1(October), 20–29.
- 716 Kaiser, K., Gyllborg, D., Procházka, J., Salašová, A., Kompaníková, P., Molina, F. L., Laguna-  
717 Goya, R., Radaszkiewicz, T., Harnoš, J., Procházková, M., Potěšil, D., Barker, R. A.,  
718 Casado, Á. G., Zdráhal, Z., Sedláček, R., Arenas, E., Villaescusa, J. C., & Bryja, V. (2019).  
719 WNT5A is transported via lipoprotein particles in the cerebrospinal fluid to regulate  
720 hindbrain morphogenesis. *Nature Communications*, 10(1), 1–15.  
721 <https://doi.org/10.1038/s41467-019-09298-4>
- 722 Kang, M., Cordova, M., Chen, C. S. J., & Rajadhyaksha, M. (2015). Simplified equation to  
723 extract diffusion coefficients from confocal FRAP data. *Journal of Investigative*  
724 *Dermatology*, 135(2), 612–615. <https://doi.org/10.1038/jid.2014.371>
- 725 Kapusta, P., Macháň, R., Benda, A., & Hof, M. (2012). Fluorescence Lifetime Correlation



- 726 Spectroscopy (FLCS): concepts, applications and outlook. *International Journal of*  
727 *Molecular Sciences*, 13(10), 12890–12910. <https://doi.org/10.3390/ijms131012890>
- 728 Kim, S. A., Heinze, K. G., & Schwille, P. (2007). Fluorescence correlation spectroscopy in  
729 living cells. *Nature Methods*, 4(11), 963–973. <https://doi.org/10.1038/nmeth1104>
- 730 Kimmel, C. B., Ballard, W. W., Kimmel, S. R., Ullmann, B., & Schilling, T. F. (1995). Stages of  
731 embryonic development of the zebrafish. *Developmental Dynamics : An Official*  
732 *Publication of the American Association of Anatomists*, 203(3), 253–310.  
733 <https://doi.org/10.1002/aja.1002030302>
- 734 Kirkpatrick, C. A., & Selleck, S. B. (2007). Heparan sulfate proteoglycans at a glance. *Journal of*  
735 *Cell Science*, 120(11), 1829–1832. <https://doi.org/10.1242/jcs.03432>
- 736 Klonis, N., Rug, M., Harper, I., Wickham, M., Cowman, A., & Tilley, L. (2002). Fluorescence  
737 photobleaching analysis for the study of cellular dynamics. *European Biophysics Journal*,  
738 31(1), 36–51. <https://doi.org/10.1007/s00249-001-0202-2>
- 739 Kondrychyn, I., Teh, C., Sin, M., & Korzh, V. (2013). -001216069090203U-main. pd. (2013).  
740 Stretching Morphogenesis of the Roof Plate and Formation of the Central Canal. *PLoS*  
741 *ONE*, 8(2), 1–12. <https://doi.org/10.1371/journal.pone.0056219>
- 742 Koppel, D. E., Axelrod, D., Schlessinger, J., Elson, E. L., & Webb, W. W. (1976). Dynamics of  
743 fluorescence marker concentration as a probe of mobility. *Biophysical Journal*, 16(11),  
744 1315–1329. [https://doi.org/10.1016/S0006-3495\(76\)85776-1](https://doi.org/10.1016/S0006-3495(76)85776-1)
- 745 Krichevsky, O., & Bonnet, G. (2002). Fluorescence correlation spectroscopy: the technique and  
746 its applications. *Reports on Progress in Physics*, 65(2), 251–297.  
747 <https://doi.org/10.1088/0034-4885/65/2/203>
- 748 Li, Q., Lau, A., Morris, T. J., Guo, L., Fordyce, C. B., & Stanley, E. F. (2004). A Syntaxin 1,  
749 Gao, and N-Type Calcium Channel Complex at a Presynaptic Nerve Terminal: Analysis by  
750 Quantitative Immunocolocalization. *Journal of Neuroscience*, 24(16), 4070–4081.  
751 <https://doi.org/10.1523/JNEUROSCI.0346-04.2004>
- 752 Lipinski, C., & Hopkins, A. (2004). Navigating chemical space for biology and medicine.  
753 *Nature*, 432(7019), 855–861. <https://doi.org/10.1038/nature03193>
- 754 Liu, P., Wakamiya, M., Shea, M. J., Albrecht, U., Behringer, R. R., & Bradley, A. (1999).  
755 Requirement for Wnt3 in vertebrate axis formation. *Nature Genetics*, 22(4), 361–365.  
756 <https://doi.org/10.1038/11932>
- 757 Logan, C. Y., & Nusse, R. (2004). The Wnt Signaling Pathway in Development and Disease.  
758 *Annual Review of Cell and Developmental Biology*, 20(1), 781–810.  
759 <https://doi.org/10.1146/annurev.cellbio.20.010403.113126>
- 760 Lord, N. D., Carte, A. N., Abitua, P. B., & Schier, A. F. (2019). The pattern of Nodal morphogen  
761 signaling is shaped by co-receptor expression. *BioRxiv*, 2019.12.30.891101.  
762 <https://doi.org/10.1101/2019.12.30.891101>
- 763 Macháň, R., Foo, Y. H., & Wohland, T. (2016). On the Equivalence of FCS and FRAP:  
764 Simultaneous Lipid Membrane Measurements. *Biophysical Journal*, 111(1), 152–161.

- 765 <https://doi.org/10.1016/j.bpj.2016.06.001>
- 766 Magde, D., Elson, E. L., & Webb, W. W. (1974). Fluorescence correlation spectroscopy. II. An  
767 experimental realization. *Biopolymers*, *13*(1), 29–61.  
768 <https://doi.org/10.1002/bip.1974.360130103>
- 769 Mattes, B., Dang, Y., Greicius, G., Kaufmann, L. T., Prunsche, B., Rosenbauer, J., Stegmaier, J.,  
770 Mikut, R., Özbek, S., Nienhaus, G. U., Schug, A., Virshup, D. M., & Scholpp, S. (2018).  
771 Wnt/PCP controls spreading of Wnt/ $\beta$ -catenin signals by cytonemes in vertebrates. *ELife*, *7*,  
772 1–28. <https://doi.org/10.7554/eLife.36953>
- 773 Mihara, E., Hirai, H., Yamamoto, H., Tamura-Kawakami, K., Matano, M., Kikuchi, A., Sato, T.,  
774 & Takagi, J. (2016). Active and water-soluble form of lipidated wnt protein is maintained  
775 by a serum glycoprotein afamin/ $\alpha$ -albumin. *ELife*, *5*(FEBRUARY2016), 1–19.  
776 <https://doi.org/10.7554/eLife.11621>
- 777 Mii, Y., & Taira, M. (2009). Secreted Frizzled-related proteins enhance the diffusion of Wnt  
778 ligands and expand their signalling range. *Development*, *136*(24), 4083–4088.  
779 <https://doi.org/10.1242/dev.032524>
- 780 Mii, Y., Yamamoto, T., Takada, R., Mizumoto, S., Matsuyama, M., Yamada, S., Takada, S., &  
781 Taira, M. (2017). Roles of two types of heparan sulfate clusters in Wnt distribution and  
782 signaling in *Xenopus*. *Nature Communications*, *8*(1), 1–19. [https://doi.org/10.1038/s41467-](https://doi.org/10.1038/s41467-017-02076-0)  
783 [017-02076-0](https://doi.org/10.1038/s41467-017-02076-0)
- 784 Mikels, A. J., & Nusse, R. (2006). Wnts as ligands: Processing, secretion and reception.  
785 *Oncogene*, *25*(57), 7461–7468. <https://doi.org/10.1038/sj.onc.1210053>
- 786 Moon, R. T., Bowerman, B., Boutros, M., & Perrimon, N. (2002). The promise and perils of Wnt  
787 signaling through  $\beta$ -catenin. *Science*, *296*(5573), 1644–1646.  
788 <https://doi.org/10.1126/science.1071549>
- 789 Müller, P., Rogers, K. W., Jordan, B. M., Lee, J. S., Robson, D., Ramanathan, S., & Schier, A. F.  
790 (2012). Differential diffusivity of nodal and lefty underlies a reaction-diffusion patterning  
791 system. *Science*, *336*(6082), 721–724. <https://doi.org/10.1126/science.1221920>
- 792 Müller, P., Rogers, K. W., Yu, S. R., Brand, M., & Schier, A. F. (2013). Morphogen transport.  
793 *Development*, *140*(8), 1621–1638. <https://doi.org/10.1242/dev.083519>
- 794 Mulligan, K. A., Fuerer, C., Ching, W., Fish, M., Willert, K., & Nusse, R. (2012). Secreted  
795 Wingless-interacting molecule (Swim) promotes long-range signaling by maintaining  
796 Wingless solubility. *Proceedings of the National Academy of Sciences of the United States*  
797 *of America*, *109*(2), 370–377. <https://doi.org/10.1073/pnas.1119197109>
- 798 Naschberger, A., Orry, A., Lechner, S., Bowler, M. W., Nurizzo, D., Novokmet, M., Keller, M.  
799 A., Oemer, G., Seppi, D., Haslbeck, M., Pansi, K., Dieplinger, H., & Rupp, B. (2017).  
800 Structural Evidence for a Role of the Multi-functional Human Glycoprotein Afamin in Wnt  
801 Transport. *Structure*, *25*(12), 1907–1915.e5. <https://doi.org/10.1016/j.str.2017.10.006>
- 802 Neumann, S., Coudreuse, D. Y. M., Van Der Westhuyzen, D. R., Eckhardt, E. R. M.,  
803 Korswagen, H. C., Schmitz, G., & Sprong, H. (2009). Mammalian Wnt3a is released on  
804 lipoprotein particles. *Traffic*, *10*(3), 334–343. <https://doi.org/10.1111/j.1600->

- 805 0854.2008.00872.x
- 806 Ng, X. W., Teh, C., Korzh, V., & Wohland, T. (2016). The Secreted Signaling Protein Wnt3 Is  
807 Associated with Membrane Domains In Vivo: A SPIM-FCS Study. *Biophysical Journal*,  
808 *111*(2), 418–429. <https://doi.org/10.1016/j.bpj.2016.06.021>
- 809 Niehrs, C. (2012). The complex world of WNT receptor signalling. *Nature Reviews Molecular*  
810 *Cell Biology*, *13*(12), 767–779. <https://doi.org/10.1038/nrm3470>
- 811 Ohkawara, B., Yamamoto, T. S., Tada, M., & Ueno, N. (2003). Role of glypican 4 in the  
812 regulation of convergent extension movements during gastrulation in *Xenopus laevis*.  
813 *Development*, *130*(10), 2129–2138. <https://doi.org/10.1242/dev.00435>
- 814 Padilla-Parra, S., Audugé, N., Coppey-Moisan, M., & Tramier, M. (2011). Dual-color  
815 fluorescence lifetime correlation spectroscopy to quantify protein–protein interactions in  
816 live cell. *Microscopy Research and Technique*, *74*(8), 788–793.  
817 <https://doi.org/10.1002/jemt.21015>
- 818 Panáková, D., Sprong, H., Marois, E., Thiele, C., & Eaton, S. (2005). Lipoprotein particles are  
819 required for Hedgehog and Wingless signalling. *Nature*, *435*(7038), 58–65.  
820 <https://doi.org/10.1038/nature03504>
- 821 Raible, F., & Brand, M. (2004). Divide et Impera—the midbrain–hindbrain boundary and its  
822 organizer. *Trends in Neurosciences*, *27*(12), 727–734.
- 823 Ries, J., Yu, S. R., Burkhardt, M., Brand, M., & Schwillle, P. (2009). Modular scanning FCS  
824 quantifies receptor-ligand interactions in living multicellular organisms. *Nature Methods*,  
825 *6*(9), 643–645. <https://doi.org/10.1038/nmeth.1355>
- 826 Routledge, D., & Scholpp, S. (2019). Mechanisms of intercellular Wnt transport. *Development*,  
827 *146*(10), dev176073. <https://doi.org/10.1242/dev.176073>
- 828 Saied-Santiago, K., Townley, R. A., Attonito, J. D., Cunha, D. S. da, Díaz-Balzac, C. A., Tecl,  
829 E., & Bülow, H. E. (2017). *Coordination of Heparan Sulfate Proteoglycans with Wnt*  
830 *Signaling To Control Cellular Migrations and*. *206*(August), 1951–1967.  
831 <https://doi.org/10.1534/genetics.116.198739/-DC1.1>
- 832 Schubert, M., & Holland, L. Z. (2013). The Wnt gene family and the evolutionary conservation  
833 of Wnt expression. In *Madame Curie Bioscience Database*. Landes Bioscience.
- 834 Schulte, G., & Wright, S. C. (2018). Frizzleds as GPCRs – More Conventional Than We  
835 Thought! *Trends in Pharmacological Sciences*, *0*(0), 1–15.  
836 <https://doi.org/10.1016/j.tips.2018.07.001>
- 837 Schwillle, P., Meyer-Almes, F. J., & Rigler, R. (1997). Dual-color fluorescence cross-correlation  
838 spectroscopy for multicomponent diffusional analysis in solution. *Biophysical Journal*,  
839 *72*(4), 1878–1886. [https://doi.org/10.1016/S0006-3495\(97\)78833-7](https://doi.org/10.1016/S0006-3495(97)78833-7)
- 840 Sezgin, E., Azbazar, Y., Ng, X. W., Teh, C., Simons, K., Weidinger, G., Wohland, T.,  
841 Eggeling, C., & Ozhan, G. (2017). Binding of canonical Wnt ligands to their receptor  
842 complexes occurs in ordered plasma membrane environments. *FEBS Journal*, *284*(15),  
843 2513–2526. <https://doi.org/10.1111/febs.14139>

- 844 Shi, X., Yong, H. F., Sudhakaran, T., Chong, S. W., Korzh, V., Ahmed, S., & Wohland, T.  
845 (2009). Determination of dissociation constants in living zebrafish embryos with single  
846 wavelength fluorescence cross-correlation spectroscopy. *Biophysical Journal*, *97*(2), 678–  
847 686. <https://doi.org/10.1016/j.bpj.2009.05.006>
- 848 Speer, K. F., Sommer, A., Tajer, B., Mullins, M. C., Klein, P. S., & Lemmon, M. A. (2019).  
849 Non-acylated Wnts Can Promote Signaling. *Cell Reports*, *26*(4), 875–883.e5.  
850 <https://doi.org/10.1016/j.celrep.2018.12.104>
- 851 Stanganello, E., Hagemann, A. I. H., Mattes, B., Sinner, C., Meyen, D., Weber, S., Schug, A.,  
852 Raz, E., & Scholpp, S. (2015). Filopodia-based Wnt transport during vertebrate tissue  
853 patterning. *Nature Communications*, *6*, 1–14. <https://doi.org/10.1038/ncomms6846>
- 854 Sun, G., Guo, S.-M., Teh, C., Korzh, V., Bathe, M., & Wohland, T. (2015). Bayesian Model  
855 Selection Applied to the Analysis of Fluorescence Correlation Spectroscopy Data of  
856 Fluorescent Proteins *in Vitro* and *in Vivo*. *Analytical Chemistry*, *87*(8), 4326–4333.  
857 <https://doi.org/10.1021/acs.analchem.5b00022>
- 858 Tao, Q., Yokota, C., Puck, H., Kofron, M., Birsoy, B., Yan, D., Asashima, M., Wylie, C. C., Lin,  
859 X., & Heasman, J. (2005). Maternal Wnt11 activates the canonical Wnt signaling pathway  
860 required for axis formation in *Xenopus* embryos. *Cell*, *120*(6), 857–871.  
861 <https://doi.org/10.1016/j.cell.2005.01.013>
- 862 Teh, C., Sun, G., Shen, H., Korzh, V., & Wohland, T. (2015). Modulating the expression level of  
863 secreted Wnt3 influences cerebellum development in zebrafish transgenics. *Development*,  
864 *142*(21), 3721–3733. <https://doi.org/10.1242/dev.127589>
- 865 Topczewski, J., Sepich, D. S., Myers, D. C., Walker, C., Amores, A., Lele, Z., Hammerschmidt,  
866 M., Postlethwait, J., & Solnica-Krezel, L. (2001). The Zebrafish Glypican Knypek Controls  
867 Cell Polarity during Gastrulation Movements of Convergent Extension. *Developmental*  
868 *Cell*, *1*(2), 251–264. [https://doi.org/10.1016/S1534-5807\(01\)00005-3](https://doi.org/10.1016/S1534-5807(01)00005-3)
- 869 Veerapathiran, S., & Wohland, T. (2018). Fluorescence techniques in developmental biology.  
870 *Journal of Biosciences*, *43*(3), 541–553. <https://doi.org/10.1007/s12038-018-9768-z>
- 871 Wang, Y., Wang, X., Wohland, T., & Sampath, K. (2016). Extracellular interactions and ligand  
872 degradation shape the nodal morphogen gradient. *ELife*, *5*(APRIL2016), 1–19.  
873 <https://doi.org/10.7554/eLife.13879>
- 874 Willems, B., Tao, S., Yu, T., Huysseune, A., Witten, P. E., & Winkler, C. (2015). The Wnt Co-  
875 Receptor Lrp5 Is Required for Cranial Neural Crest Cell Migration in Zebrafish. *PLoS*  
876 *ONE*, 1–21. <https://doi.org/10.1371/journal.pone.0131768>
- 877 Wilsie, L. C., & Orlando, R. A. (2003). The low density lipoprotein receptor-related protein  
878 complexes with cell surface heparan sulfate proteoglycans to regulate proteoglycan-  
879 mediated lipoprotein catabolism. *Journal of Biological Chemistry*, *278*(18), 15758–15764.  
880 <https://doi.org/10.1074/jbc.M208786200>
- 881 Wilson, M. A. (2017). Structural Insight into a Fatty-Acyl Chaperone for Wnt Proteins.  
882 *Structure*, *25*(12), 1781–1782. <https://doi.org/10.1016/j.str.2017.11.009>
- 883 Wu, C. H., & Nusse, R. (2002). Ligand receptor interactions in the Wnt signaling pathway in

- 884 *Drosophila*. *Journal of Biological Chemistry*, 277(44), 41762–41769.  
885 <https://doi.org/10.1074/jbc.M207850200>
- 886 Wurst, W., & Bally-Cuif, L. (2001). Neural plate patterning: upstream and downstream of the  
887 isthmus organizer. *Nature Reviews Neuroscience*, 2(2), 99–108.
- 888 Yavas, S., Macháň, R., & Wohland, T. (2016). The Epidermal Growth Factor Receptor Forms  
889 Location-Dependent Complexes in Resting Cells. *Biophysical Journal*, 111(10), 2241–  
890 2254. <https://doi.org/10.1016/j.bpj.2016.09.049>
- 891 Zhu, S., Welsch, R. E., & Matsudaira, P. T. (2016). A method to quantify co-localization in  
892 biological images. *Proceedings of the Annual International Conference of the IEEE*  
893 *Engineering in Medicine and Biology Society, EMBS, 2016-October*, 3887–3890.  
894 <https://doi.org/10.1109/EMBC.2016.7591577>
- 895
- 896
